# Supplementary material for: A genome-wide interactome of DNA-associated proteins in the human liver
Source: PubMed Central journal article supplement — Genome Res. 2017 Nov;27(11):1950–60. doi: 10.1101/gr.222083.117 (PMC5668951; doi:10.1101/gr.222083.117), 2017-11
Supplement: supp_gr.222083.117_Supplemental_Fig_S1.pdf [file supp_gr.222083.117_Supplemental_Fig_S1.pdf]

 **Adult**  
 **Child**

**Spearman Correlation**

1.0 

0.5 

0.0 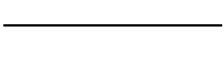

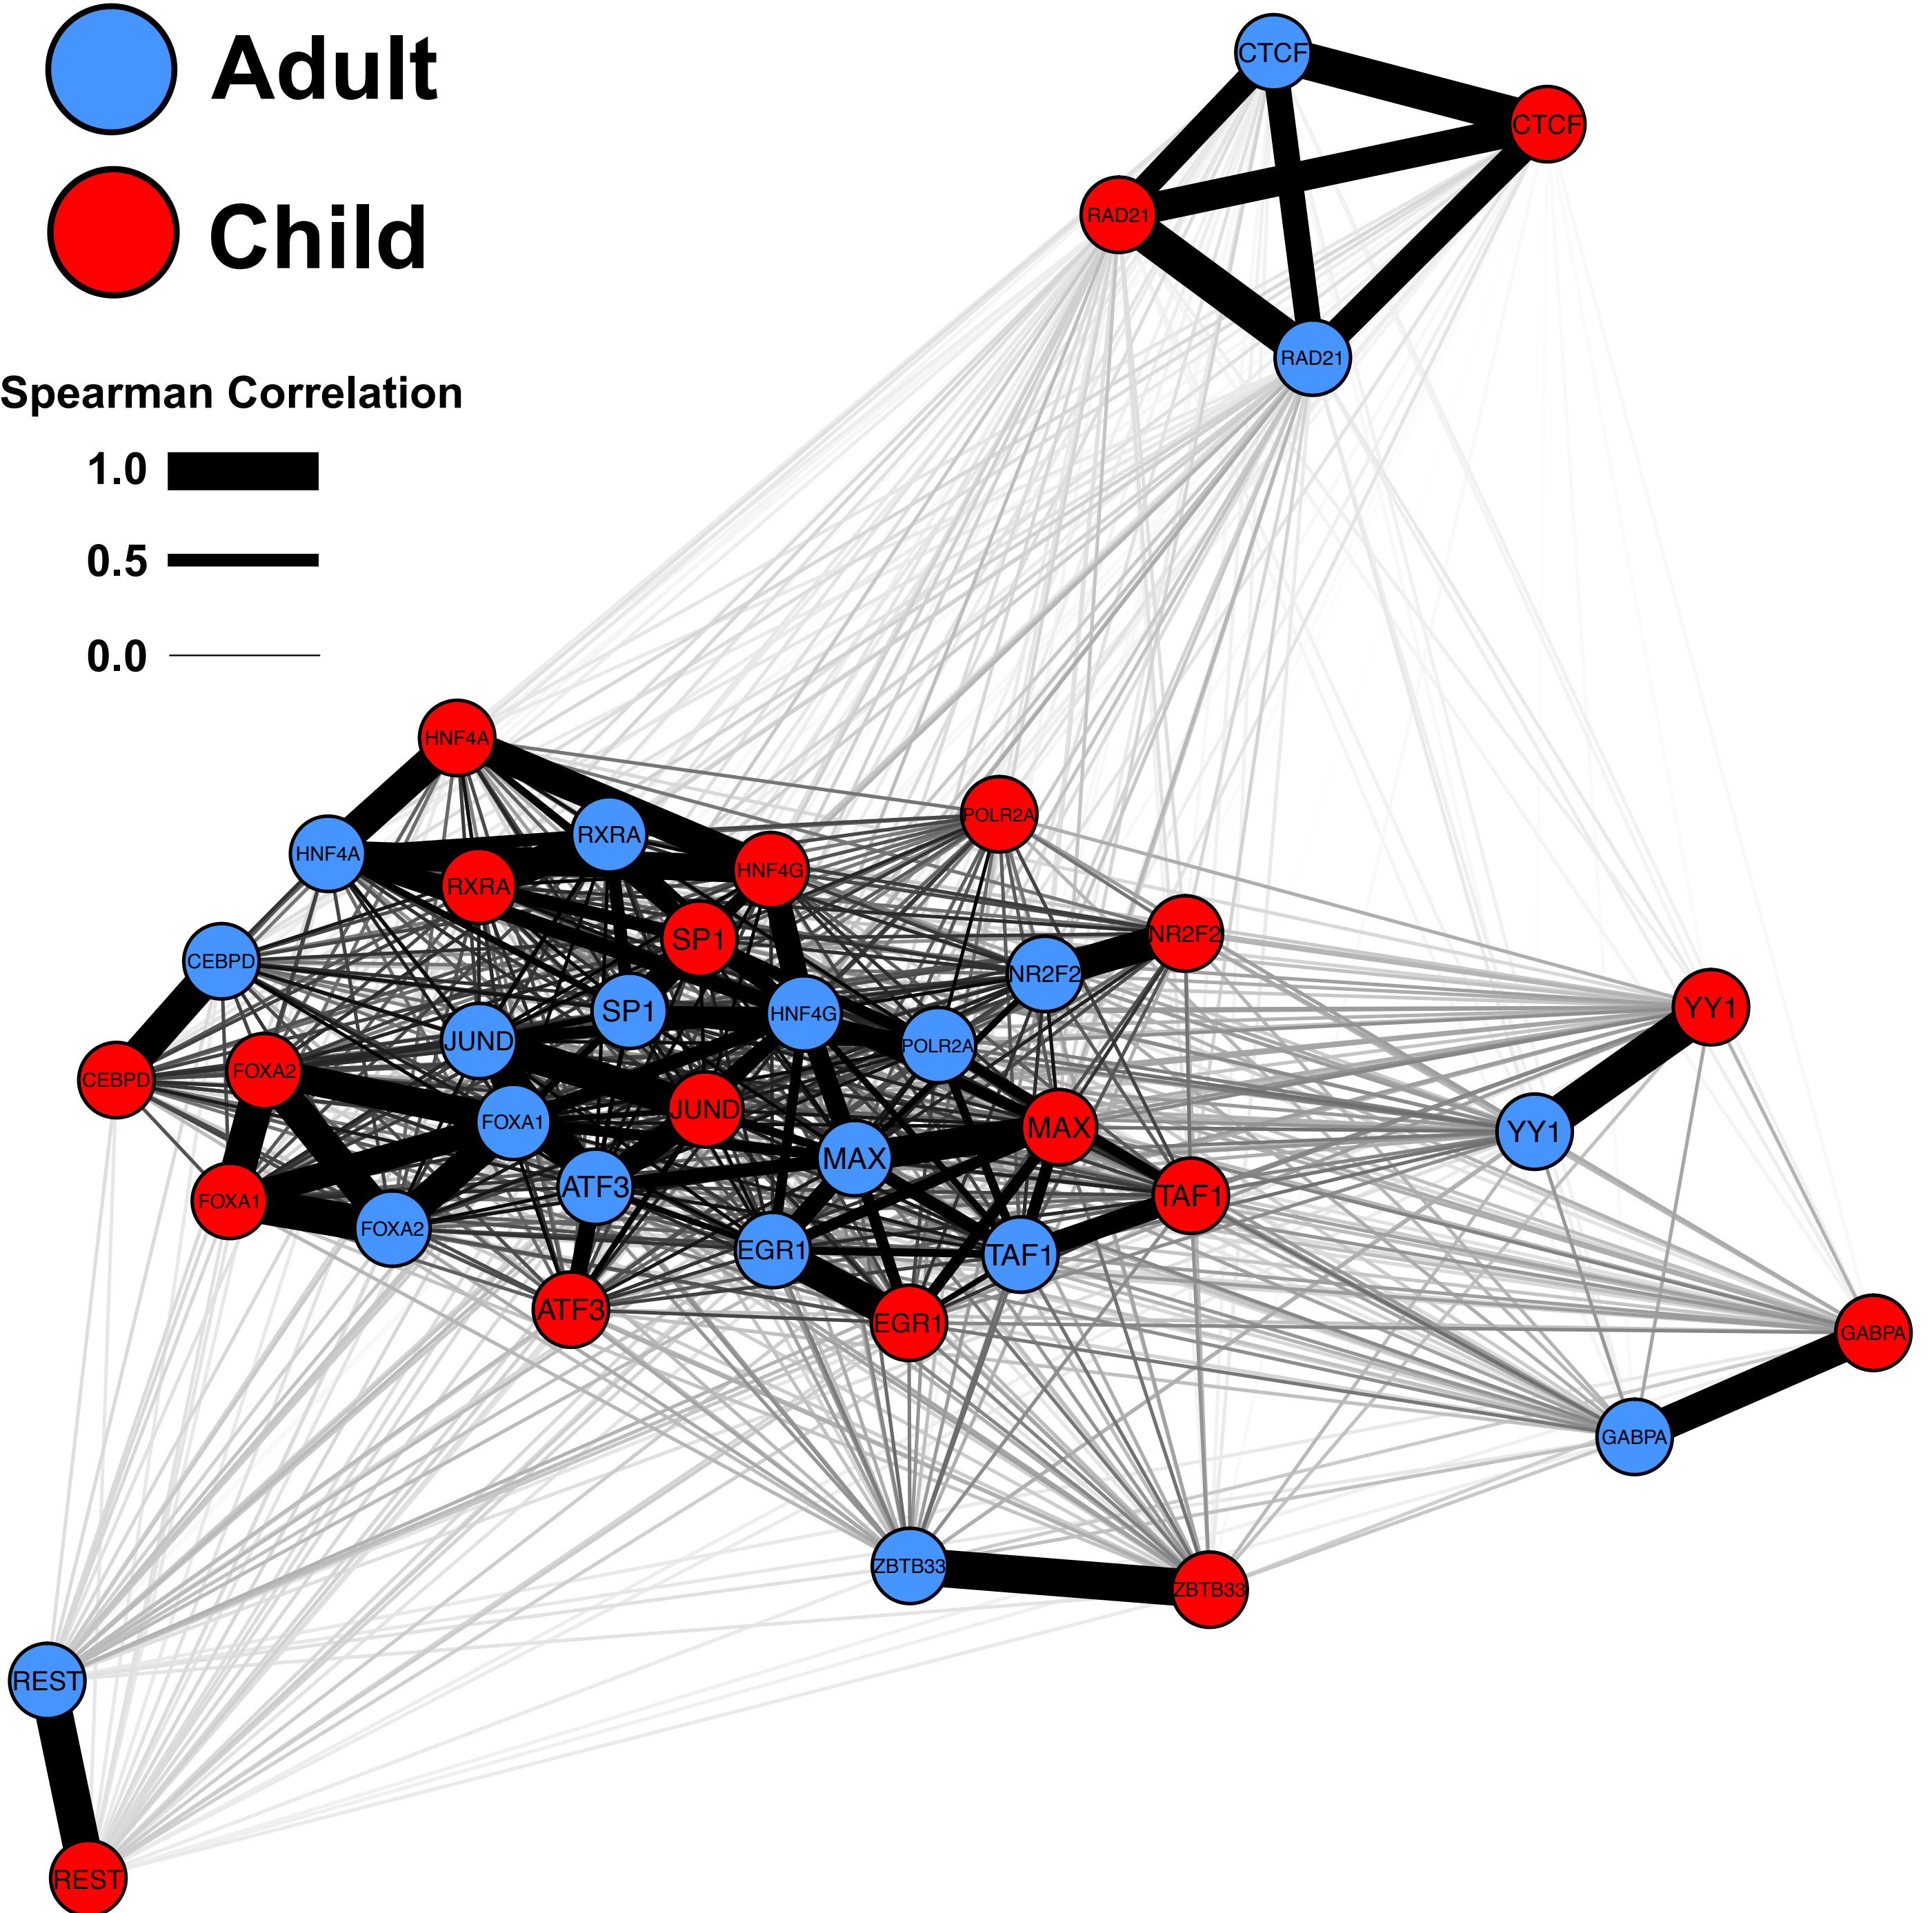

**Supplemental\_Fig\_S1.** Correlation network diagram showing relationships between normalized DAP binding intensities at all observed binding sites of both livers. Blue and red nodes indicate adult and child binding sites, respectively, and the width of each edge indicates the strength of the Spearman correlation between each factor.
