# Supplementary material for: A genome-wide interactome of DNA-associated proteins in the human liver
Source: PubMed Central journal article supplement — Genome Res. 2017 Nov;27(11):1950–60. doi: 10.1101/gr.222083.117 (PMC5668951; doi:10.1101/gr.222083.117), 2017-11
Supplement: supp_gr.222083.117_Supplemental_Fig_S3.pdf [file supp_gr.222083.117_Supplemental_Fig_S3.pdf]

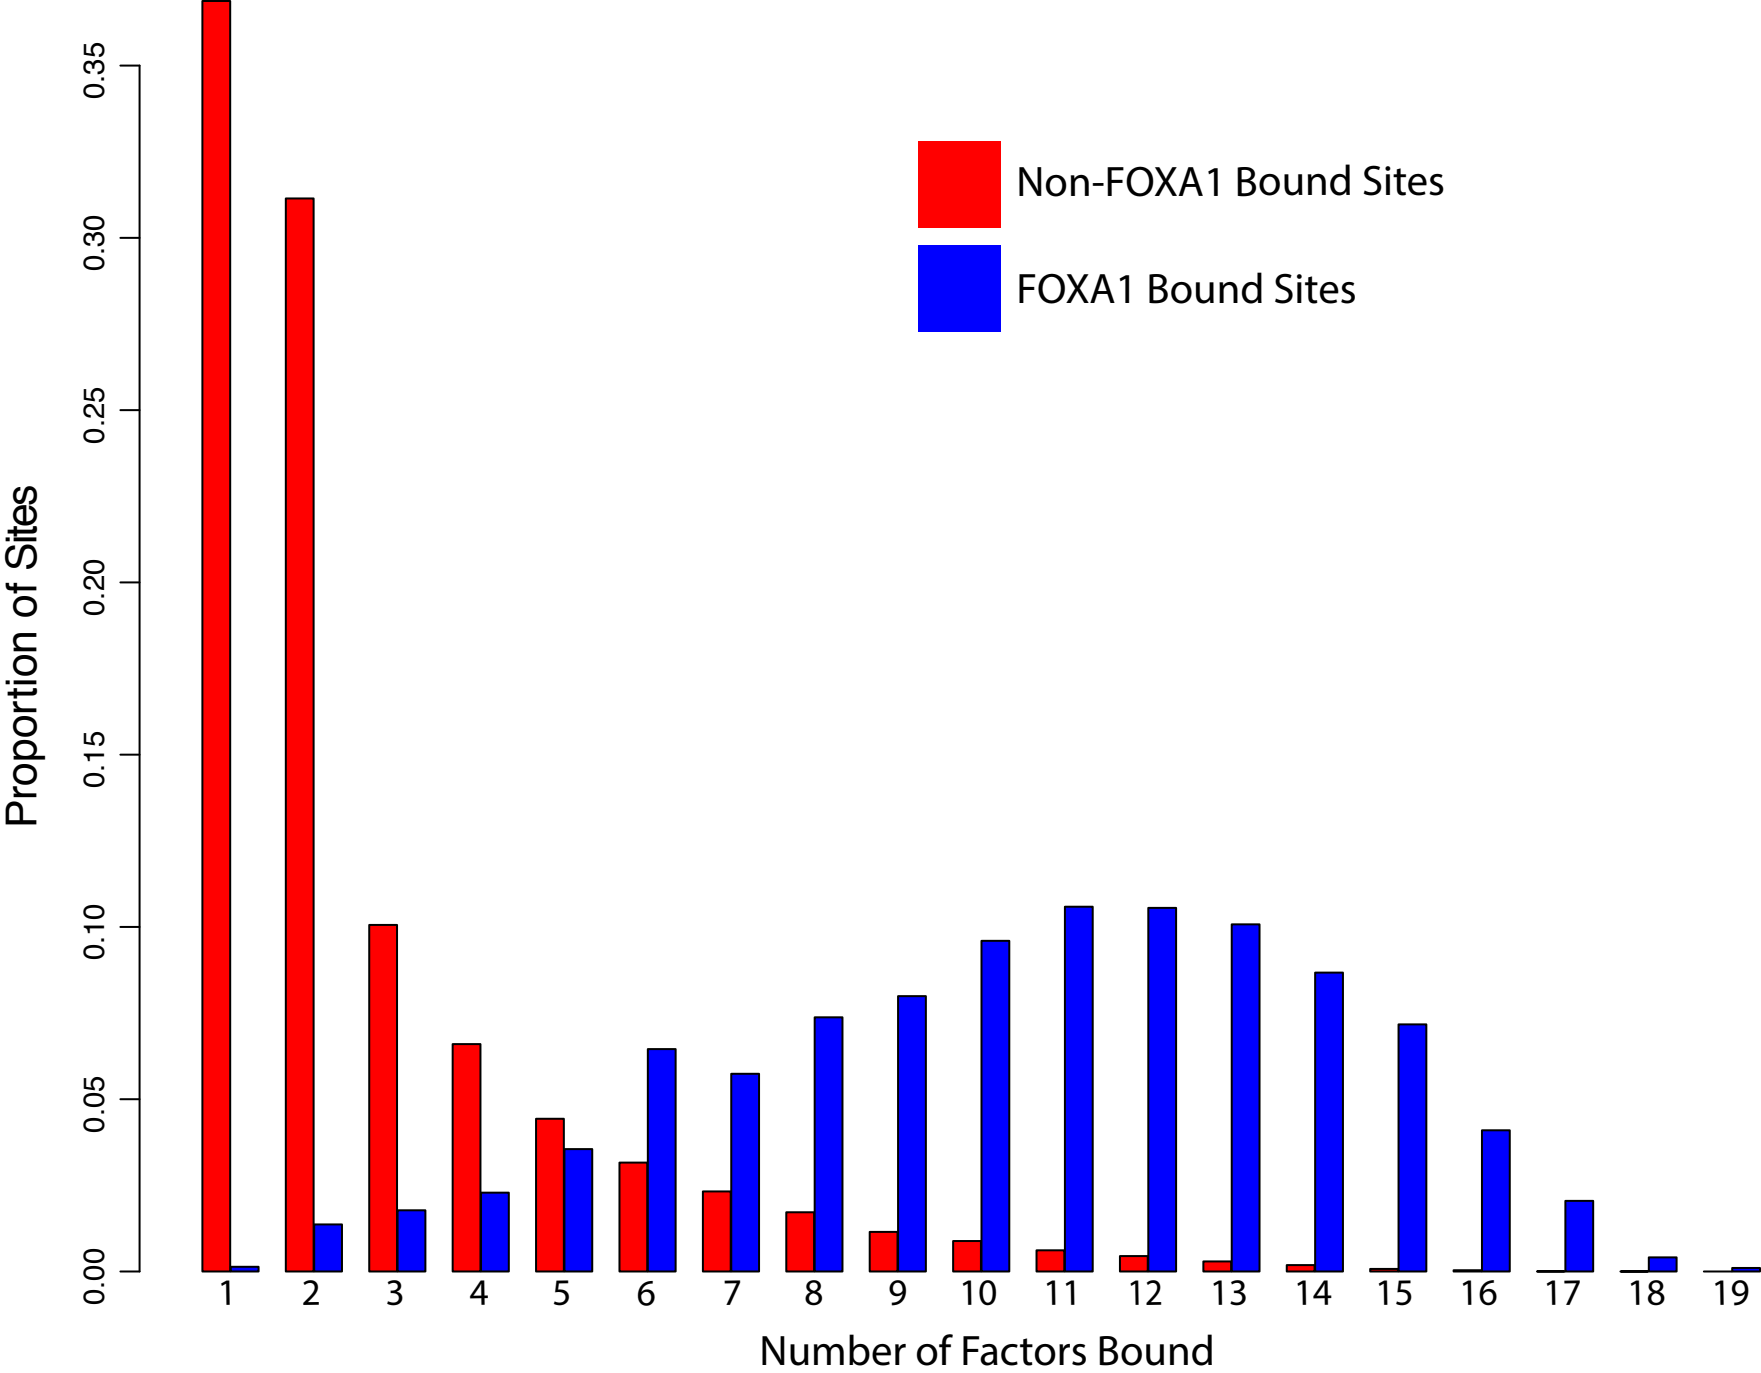

**Supplemental\_Fig\_S3.** Bar plot indicating the proportion of factors bound at merged DAP binding sites in which FOXA1 is bound (blue) or is absent (red).
