# Supplementary material for: A genome-wide interactome of DNA-associated proteins in the human liver
Source: PubMed Central journal article supplement — Genome Res. 2017 Nov;27(11):1950–60. doi: 10.1101/gr.222083.117 (PMC5668951; doi:10.1101/gr.222083.117), 2017-11
Supplement: supp_gr.222083.117_Supplemental_Fig_S4.pdf [file supp_gr.222083.117_Supplemental_Fig_S4.pdf]

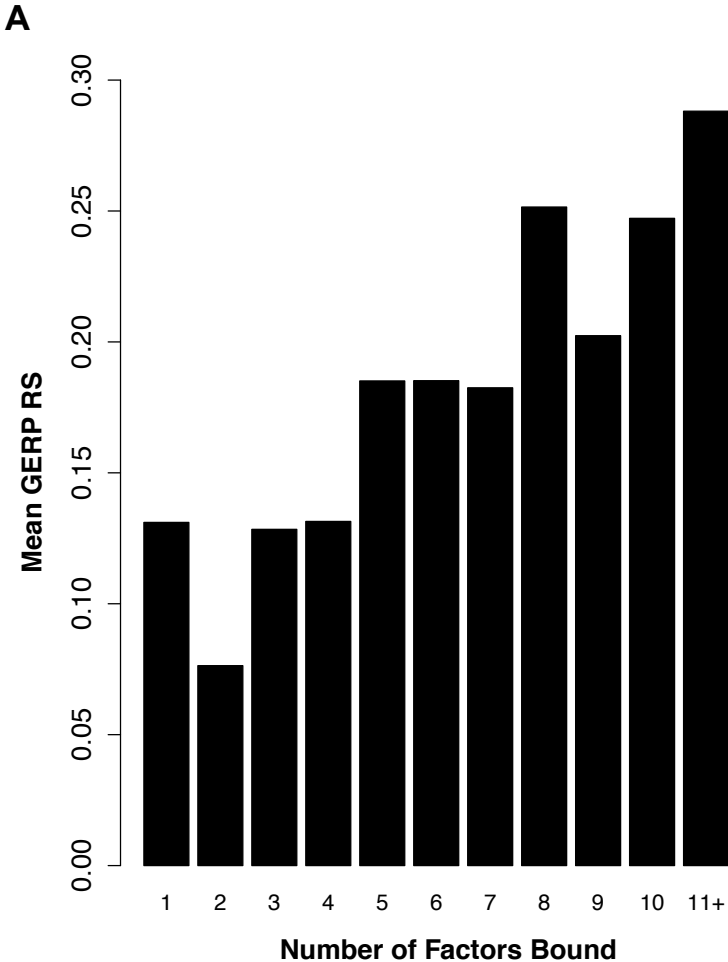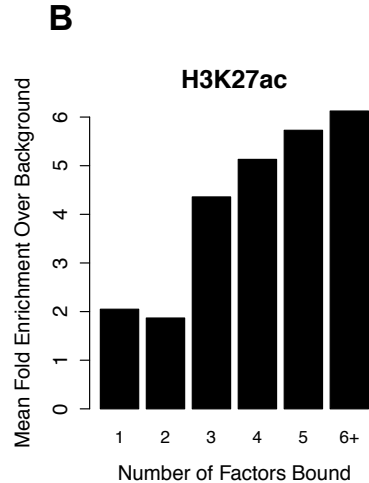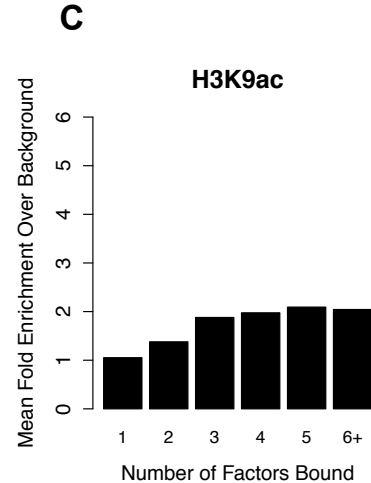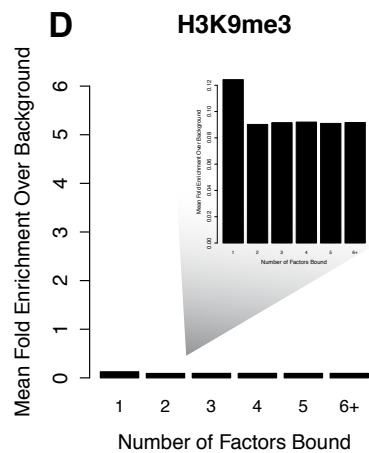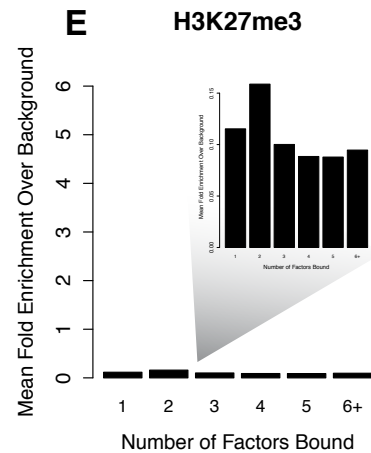

**Supplemental\_Fig\_S4.** (A) Mean Genomic Evolutionary Rate Profiling GERP score of genomic regions containing an increasing number of factors bound. (B-E) Epigenome Roadmap project histone mark fold enrichments over background at sites with increasing numbers of factors bound.
