# Supplementary material for: A genome-wide interactome of DNA-associated proteins in the human liver
Source: PubMed Central journal article supplement — Genome Res. 2017 Nov;27(11):1950–60. doi: 10.1101/gr.222083.117 (PMC5668951; doi:10.1101/gr.222083.117), 2017-11
Supplement: supp_gr.222083.117_Supplemental_Fig_S5.pdf [file supp_gr.222083.117_Supplemental_Fig_S5.pdf]

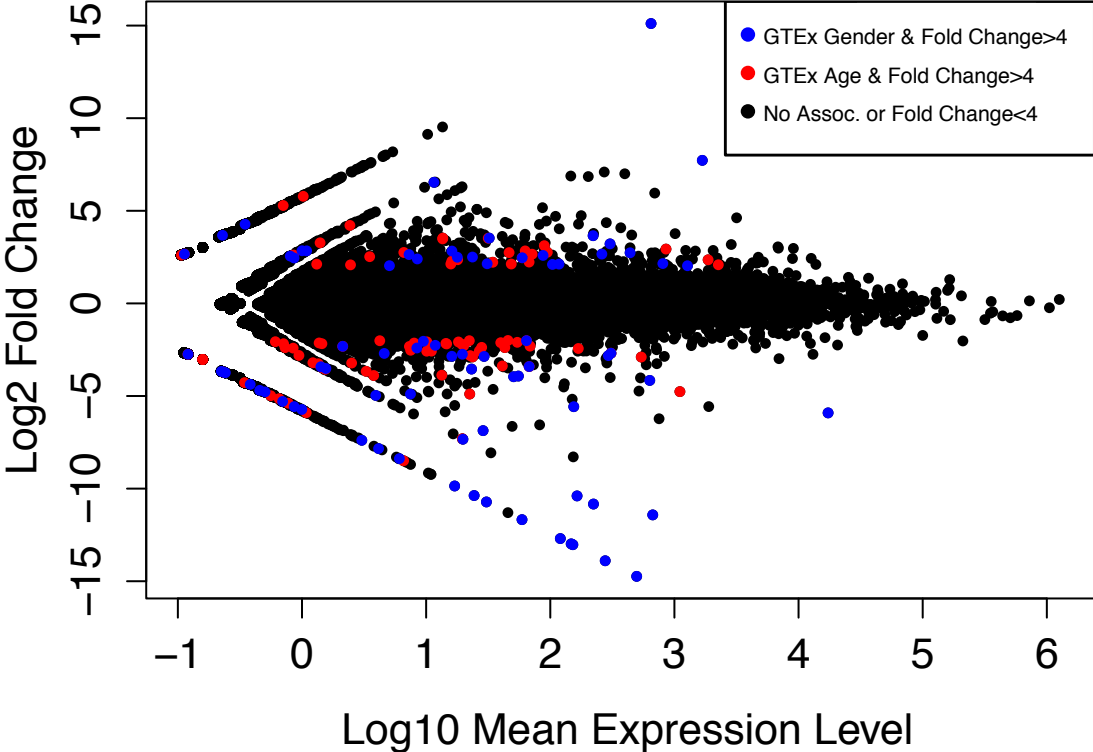

**Supplemental\_Fig\_S5.** Scatter plot displaying the fold expression difference (adult-male donor/child-female donor) and mean expression level of each autosomal gene. Blue and red dots indicate genes that were significantly associated (DESeq2 FDR<0.05) with gender and age in the GTEx liver tissue cohort (n=119, 78 male, 41 female, age range=20-69 years) and had at least a fold change expression difference of at least 4 in both of our donors.
