# Supplementary material for: A genome-wide interactome of DNA-associated proteins in the human liver
Source: PubMed Central journal article supplement — Genome Res. 2017 Nov;27(11):1950–60. doi: 10.1101/gr.222083.117 (PMC5668951; doi:10.1101/gr.222083.117), 2017-11
Supplement: supp_gr.222083.117_Supplemental_Fig_S6.pdf [file supp_gr.222083.117_Supplemental_Fig_S6.pdf]

**A****Number of DAPs Bound within 1kb**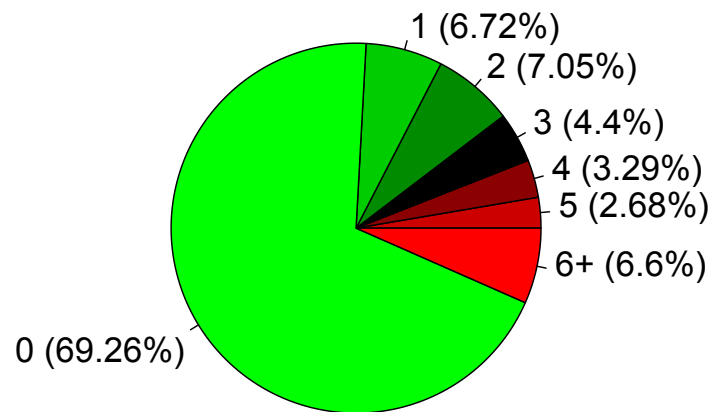**Number of DAPs Bound within 10kb**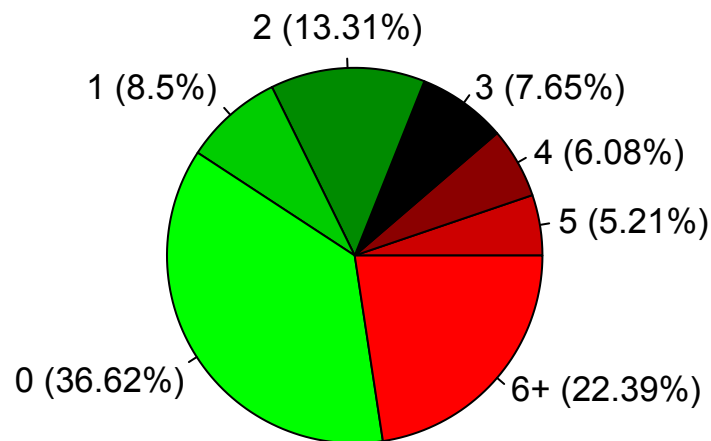**B**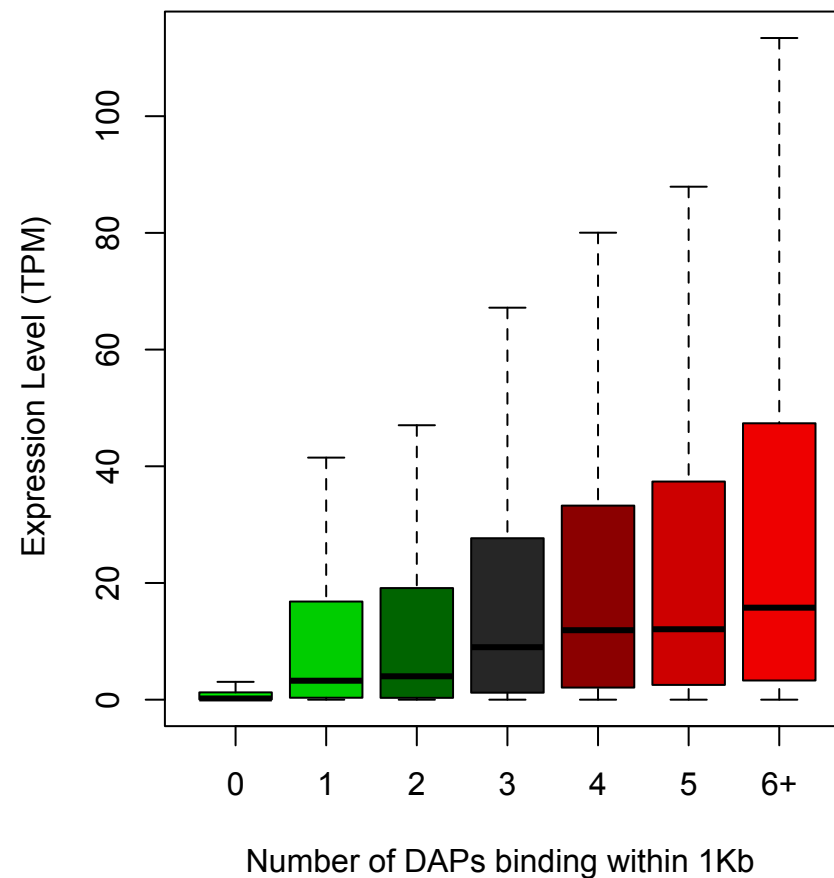

**Supplemental\_Fig\_S6.** (A) Pie chart representing the percent of genes containing a specified amount of bound DAPs within 1Kb of their TSS for the child liver. Color scale reflects the number of neighboring DAPs required to be included in each slice. (B) Expression level of genes binned by the number of DAPs bound within 1Kb of their TSS for the child liver.
