# Supplementary material for: A genome-wide interactome of DNA-associated proteins in the human liver
Source: PubMed Central journal article supplement — Genome Res. 2017 Nov;27(11):1950–60. doi: 10.1101/gr.222083.117 (PMC5668951; doi:10.1101/gr.222083.117), 2017-11
Supplement: supp_gr.222083.117_Supplemental_Fig_S7.pdf [file supp_gr.222083.117_Supplemental_Fig_S7.pdf]

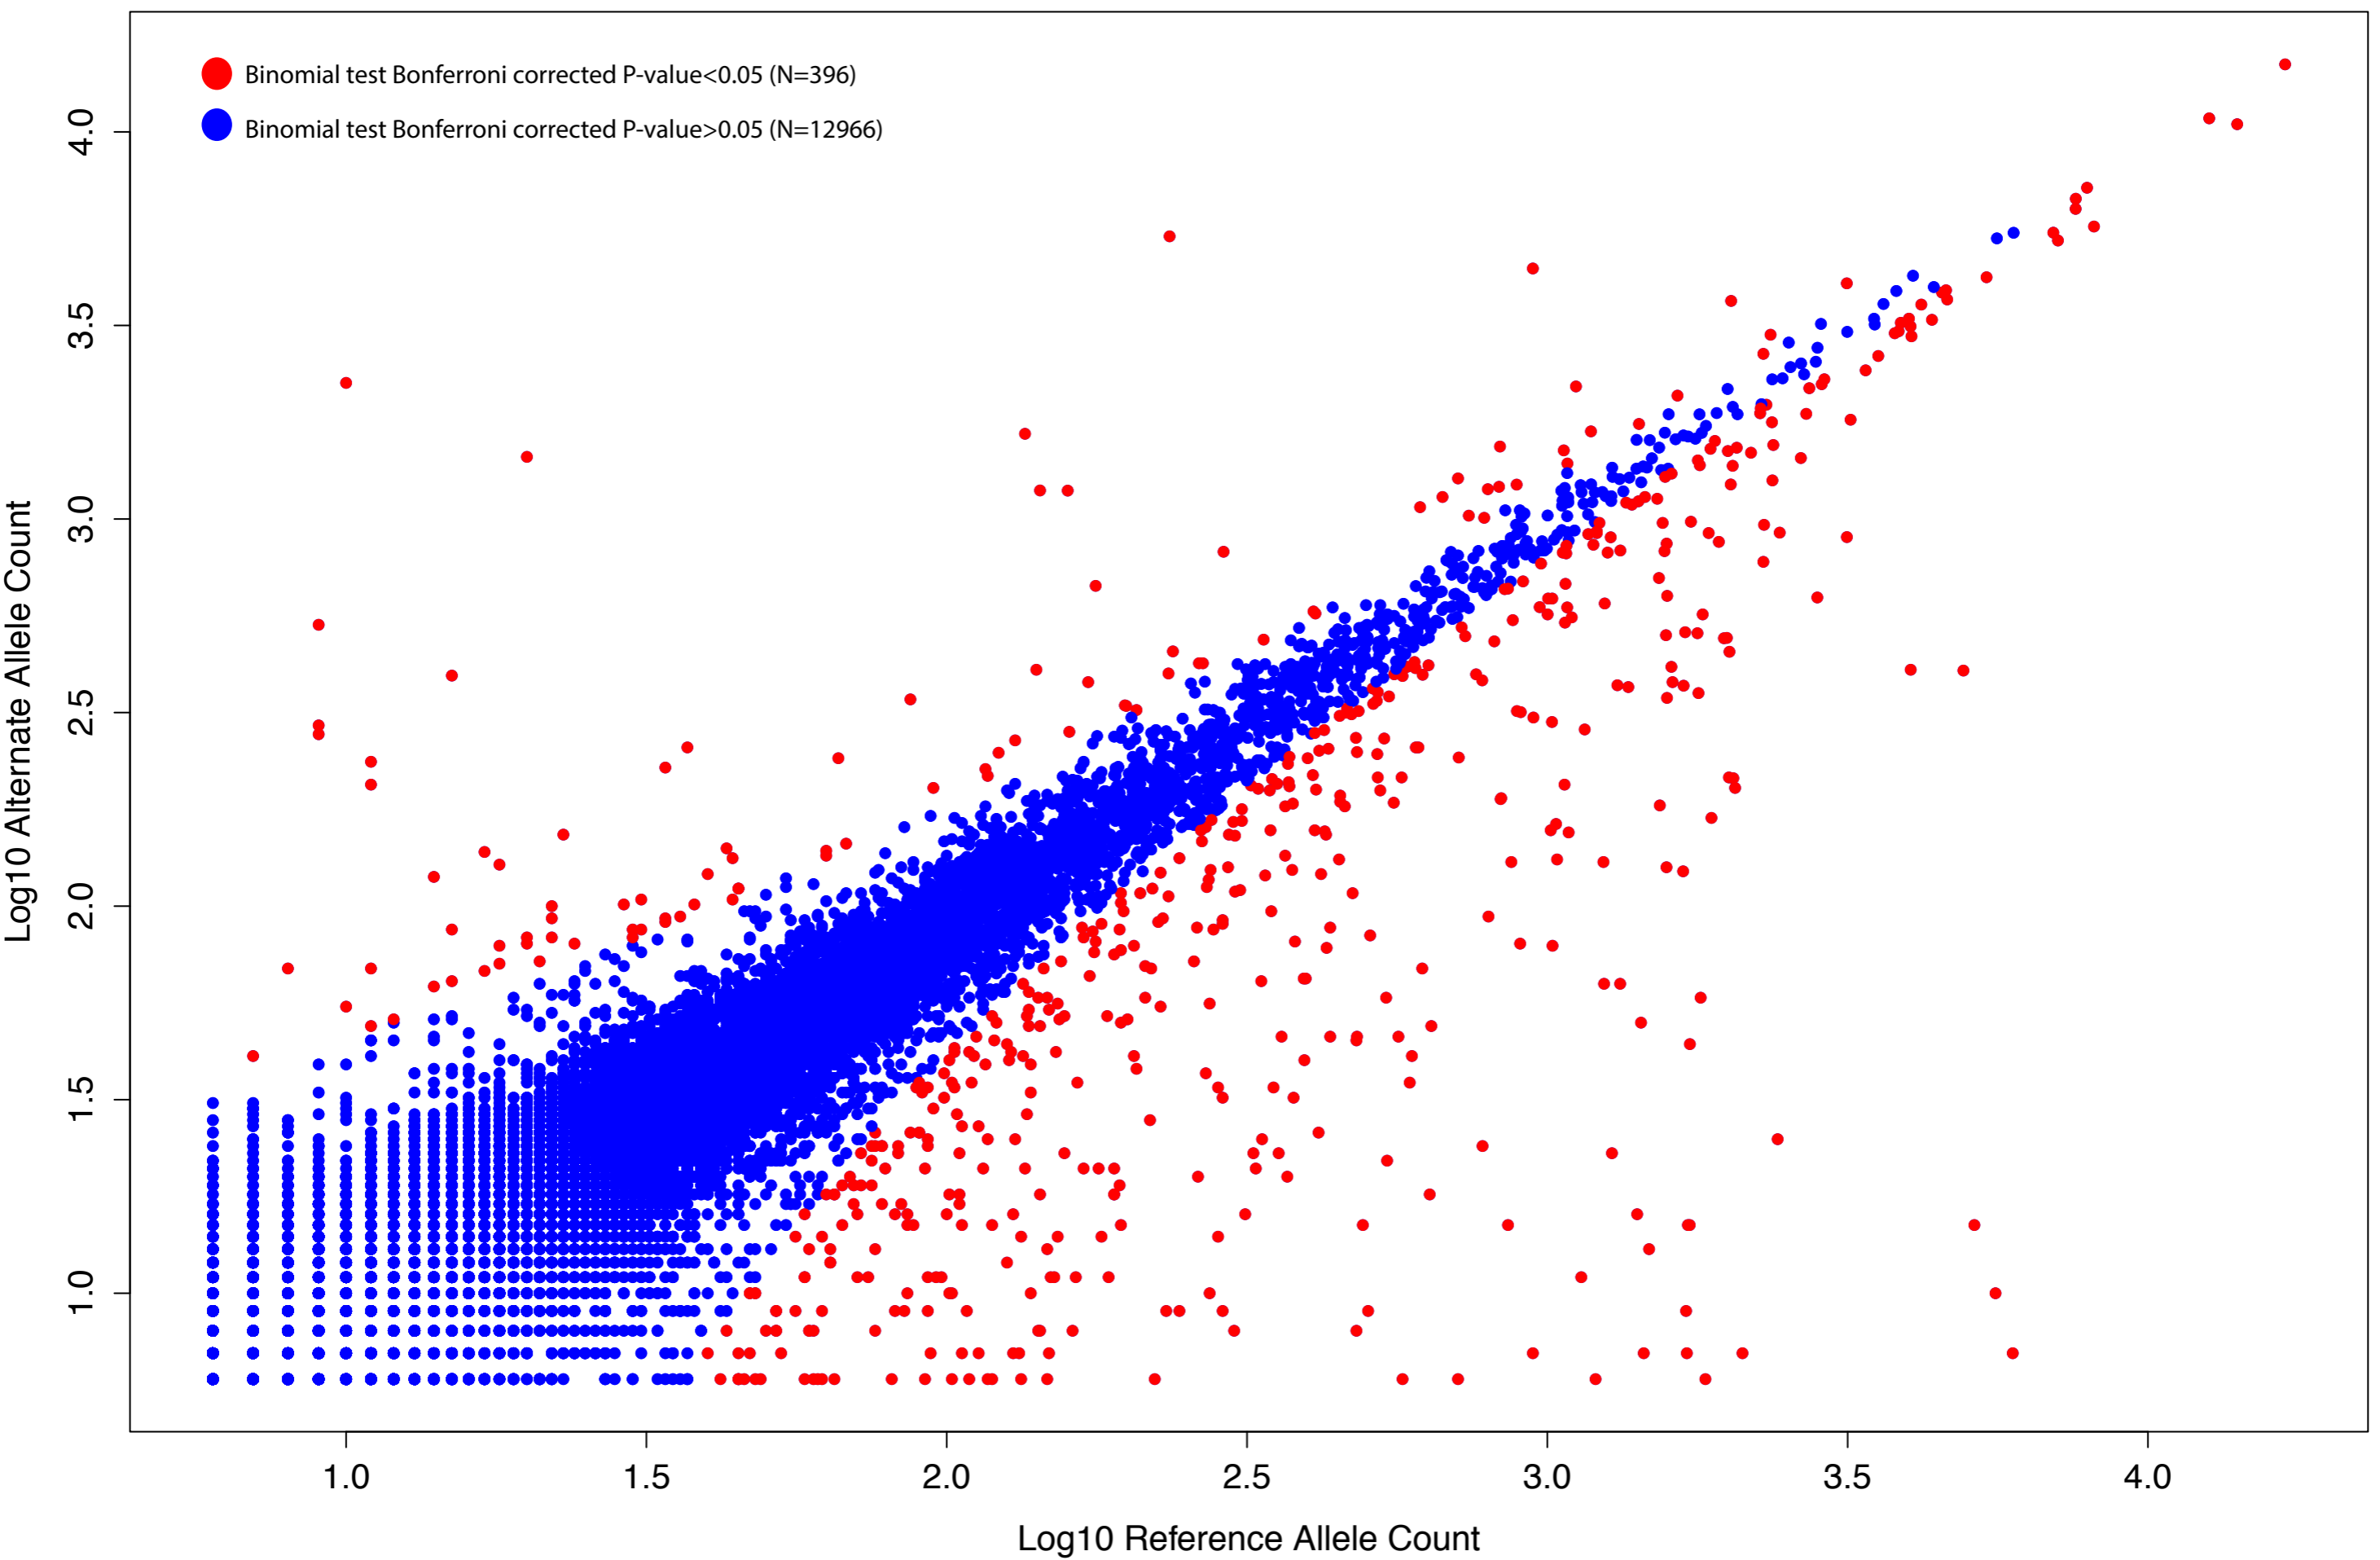

**Supplemental\_Fig\_S7.** Scatter plot indicating the number of RNA-seq reads mapping to the reference and alternate allele at expressed heterozygous SNPs in the adult liver. Red dots indicate SNPs that hold a Bonferroni corrected P-value < 0.05 for differential allele expression while blue dots indicate SNPs with a P-value > 0.05.
