# Supplementary material for: A genome-wide interactome of DNA-associated proteins in the human liver
Source: PubMed Central journal article supplement — Genome Res. 2017 Nov;27(11):1950–60. doi: 10.1101/gr.222083.117 (PMC5668951; doi:10.1101/gr.222083.117), 2017-11
Supplement: supp_gr.222083.117_Supplemental_Fig_S8.pdf [file supp_gr.222083.117_Supplemental_Fig_S8.pdf]

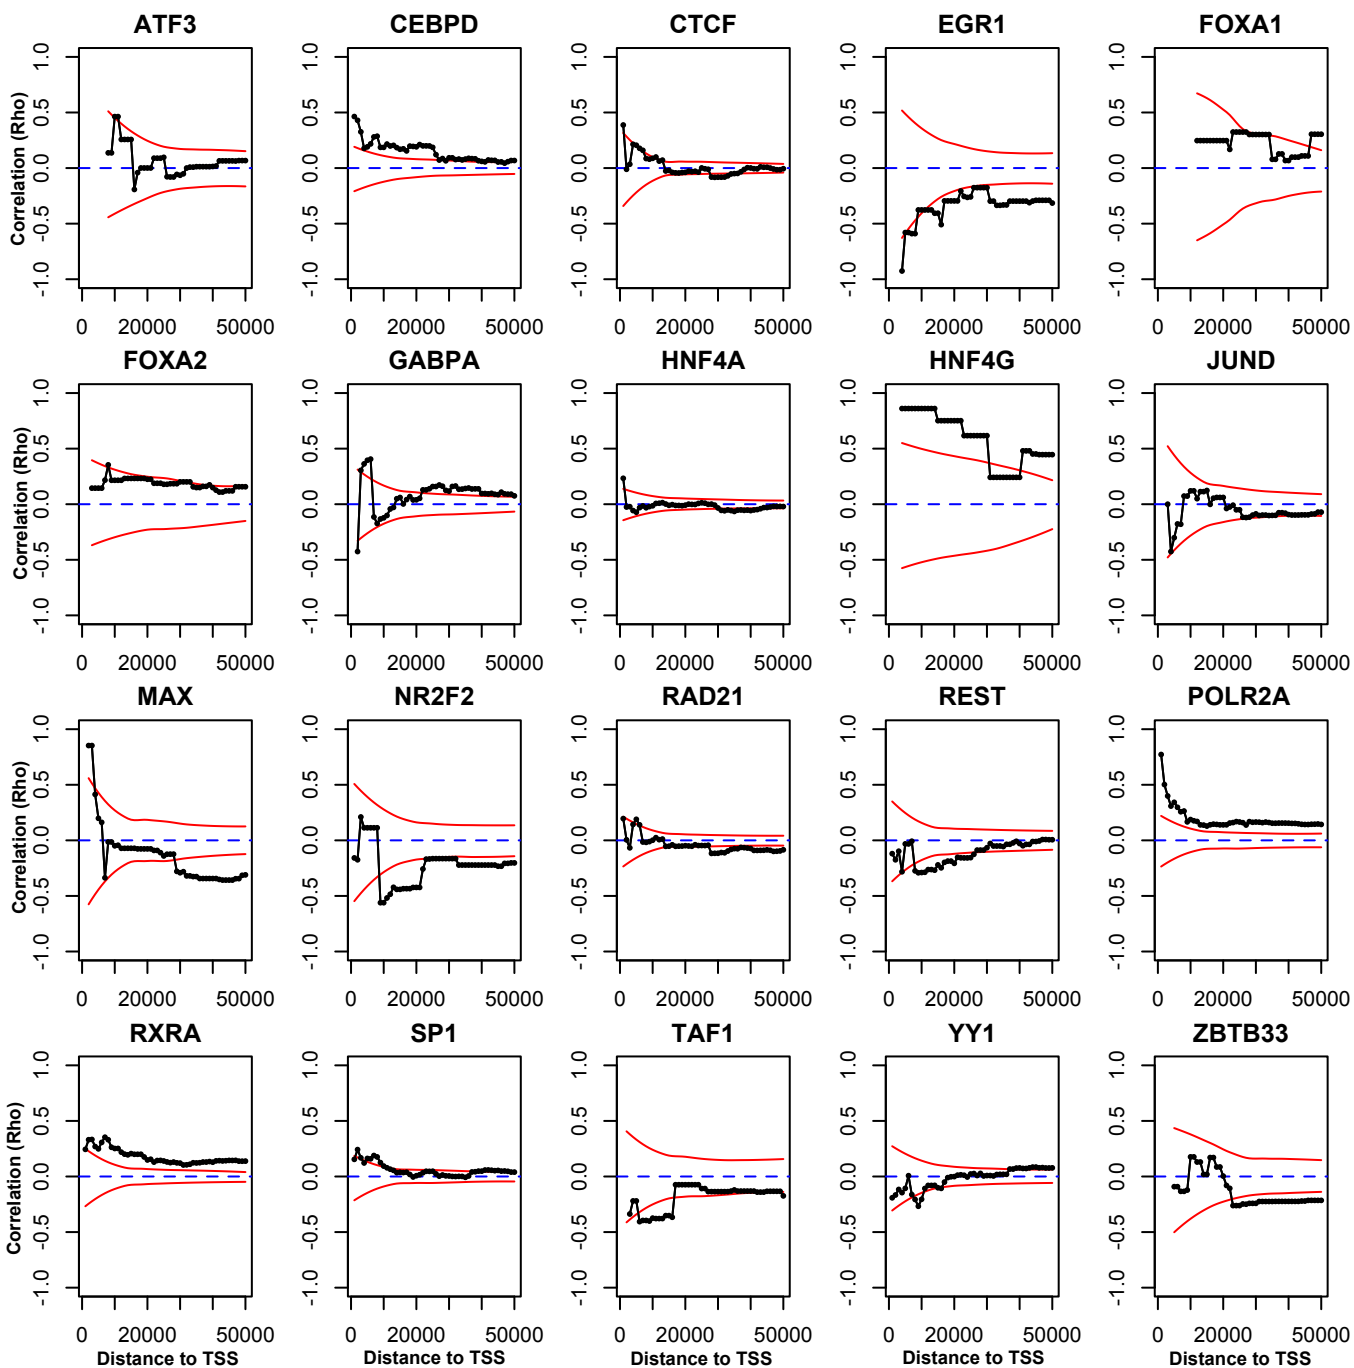

**Supplemental\_Fig\_S8.** Plot indicating the correlation in DAP binding allelic bias and neighboring gene expression allelic bias at a variety of binding site-TSS distance thresholds for each DAP. A positive correlation indicates a DAP tends to predominantly bind on the same allele that is predominantly expressed. A correlation of zero is indicated by the blue dashed line. Ninety five percent confidence (red) intervals calculated by randomly shuffling all SNP pairs that met a distance threshold 100 times and computing a null correlation distribution.
