# Supplementary material for: A genome-wide interactome of DNA-associated proteins in the human liver
Source: PubMed Central journal article supplement — Genome Res. 2017 Nov;27(11):1950–60. doi: 10.1101/gr.222083.117 (PMC5668951; doi:10.1101/gr.222083.117), 2017-11
Supplement: supp_gr.222083.117_Supplemental_Fig_S12.pdf [file supp_gr.222083.117_Supplemental_Fig_S12.pdf]

## 2-Fold Enrichment Threshold

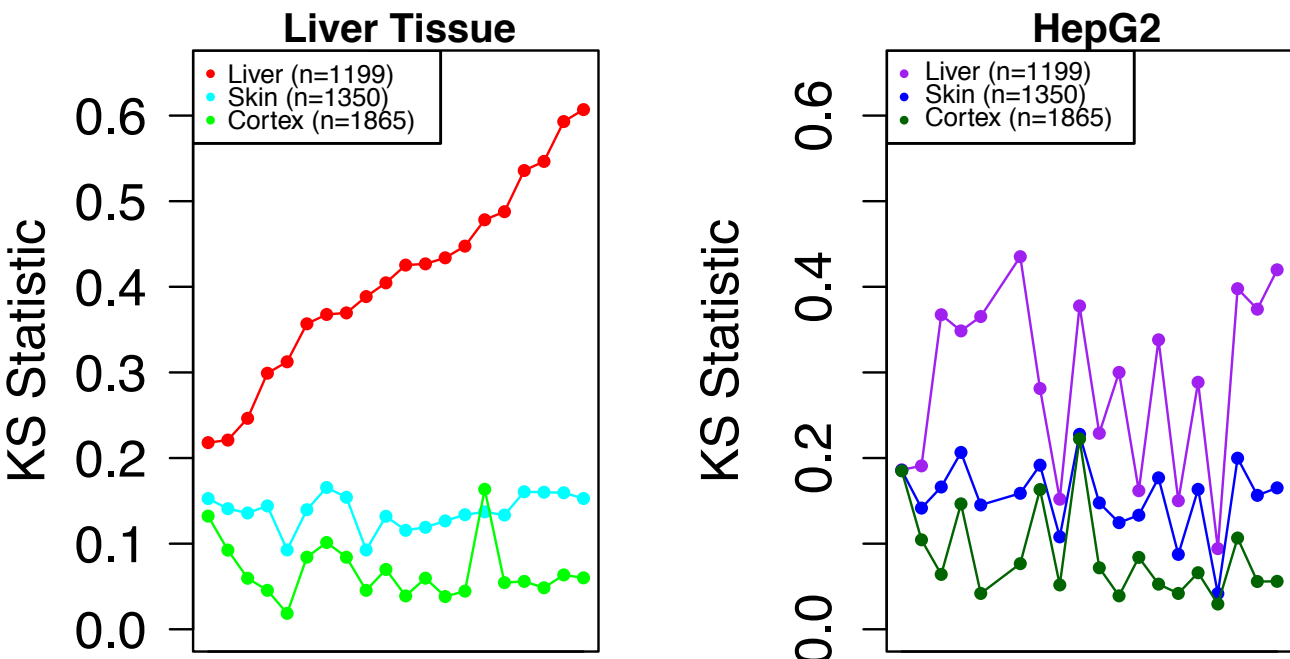

## 3-Fold Enrichment Threshold

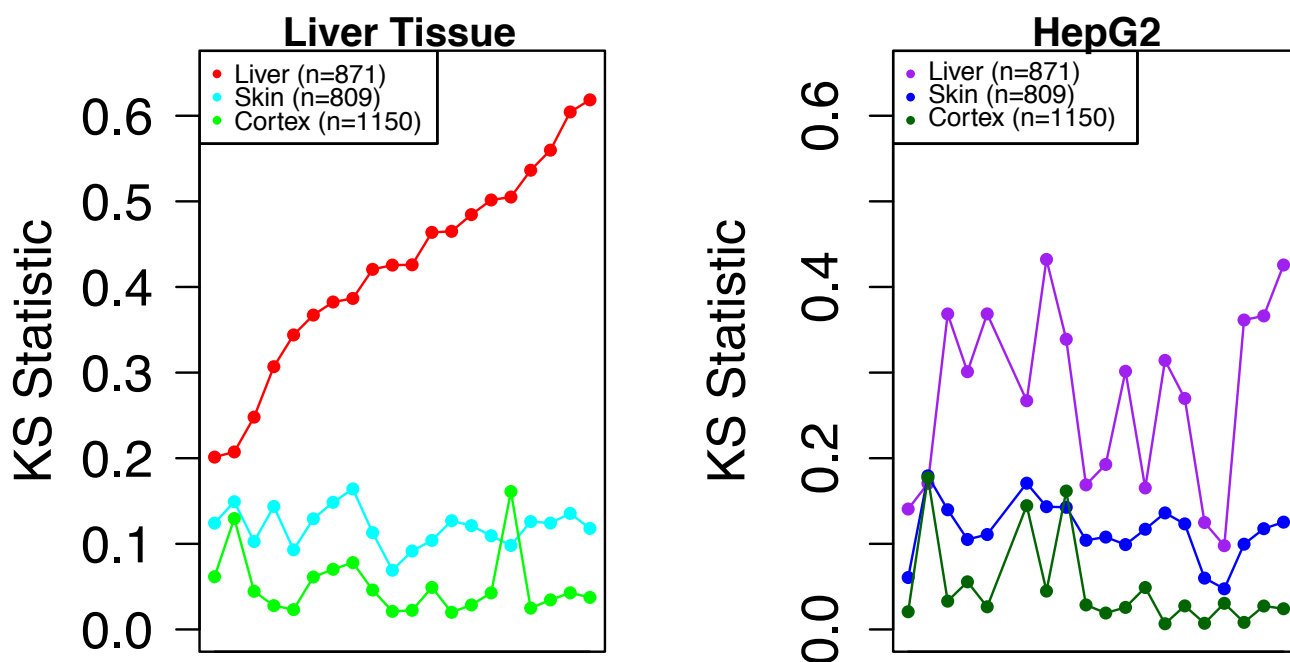

## 4-Fold Enrichment Threshold

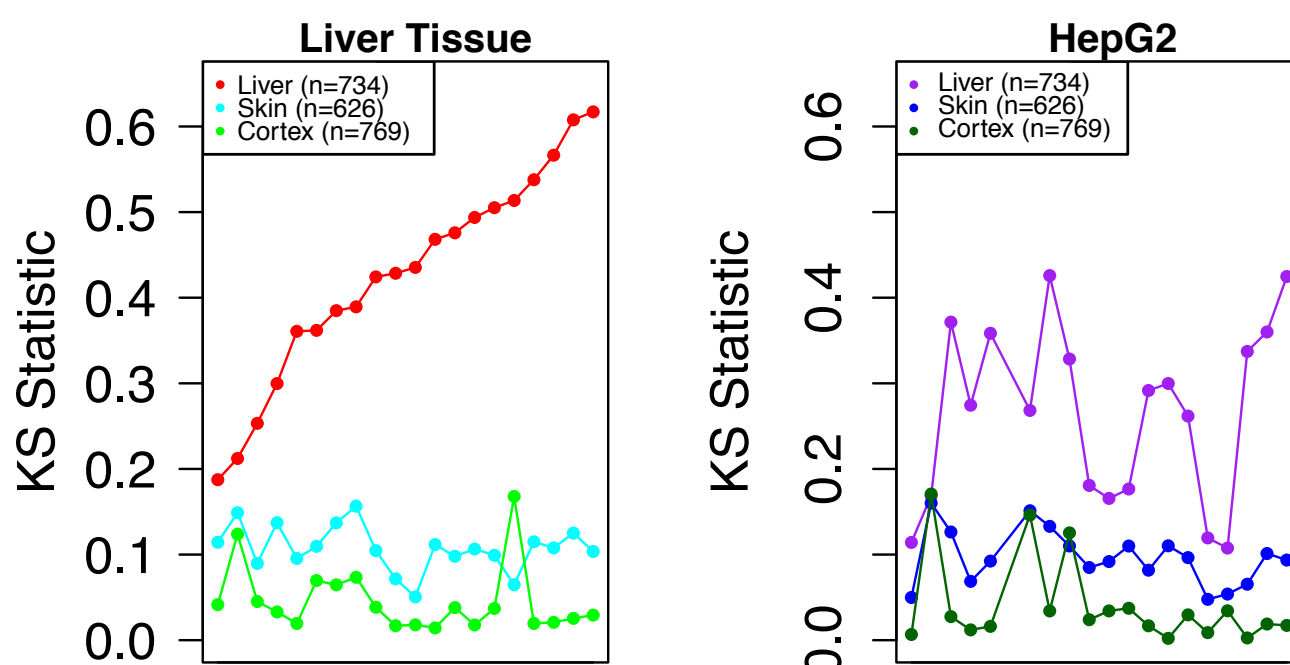

## 5-Fold Enrichment Threshold

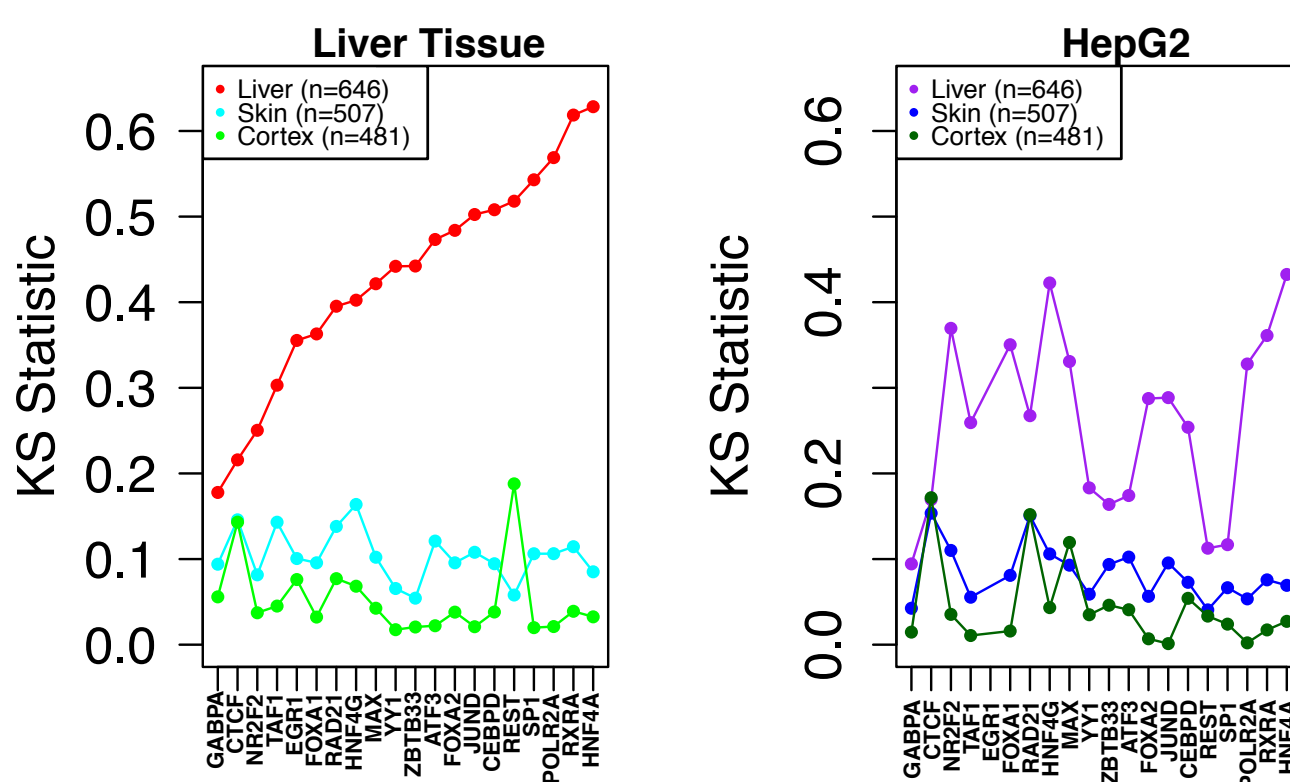

**Supplemental\_Fig\_S12.** Enrichment for proximal binding to liver specific expression analysis, as shown in Figure 3C-D, over a range of fold enrichment threshold cutoffs. From top to bottom, tissue specific transcripts were defined as those with a mean RPKM of 2 in a given tissue of interest and 2, 3, 4, and 5-fold increased mean expression in the tissue of interest relative to the mean expression across all other tissues. Dots represent KS-statistic of enrichment for proximal binding of each DAP to liver (red/purple), skin (blue) and cortex (green) -specific genes in adult liver tissue (left) and HepG2 cell line (right).
