# Supplementary material for: A genome-wide interactome of DNA-associated proteins in the human liver
Source: PubMed Central journal article supplement — Genome Res. 2017 Nov;27(11):1950–60. doi: 10.1101/gr.222083.117 (PMC5668951; doi:10.1101/gr.222083.117), 2017-11
Supplement: supp_gr.222083.117_Supplemental_Fig_S13.pdf [file supp_gr.222083.117_Supplemental_Fig_S13.pdf]

# Fraction of Tissue Specific eQTL SNPs Overlapping a Binding Site

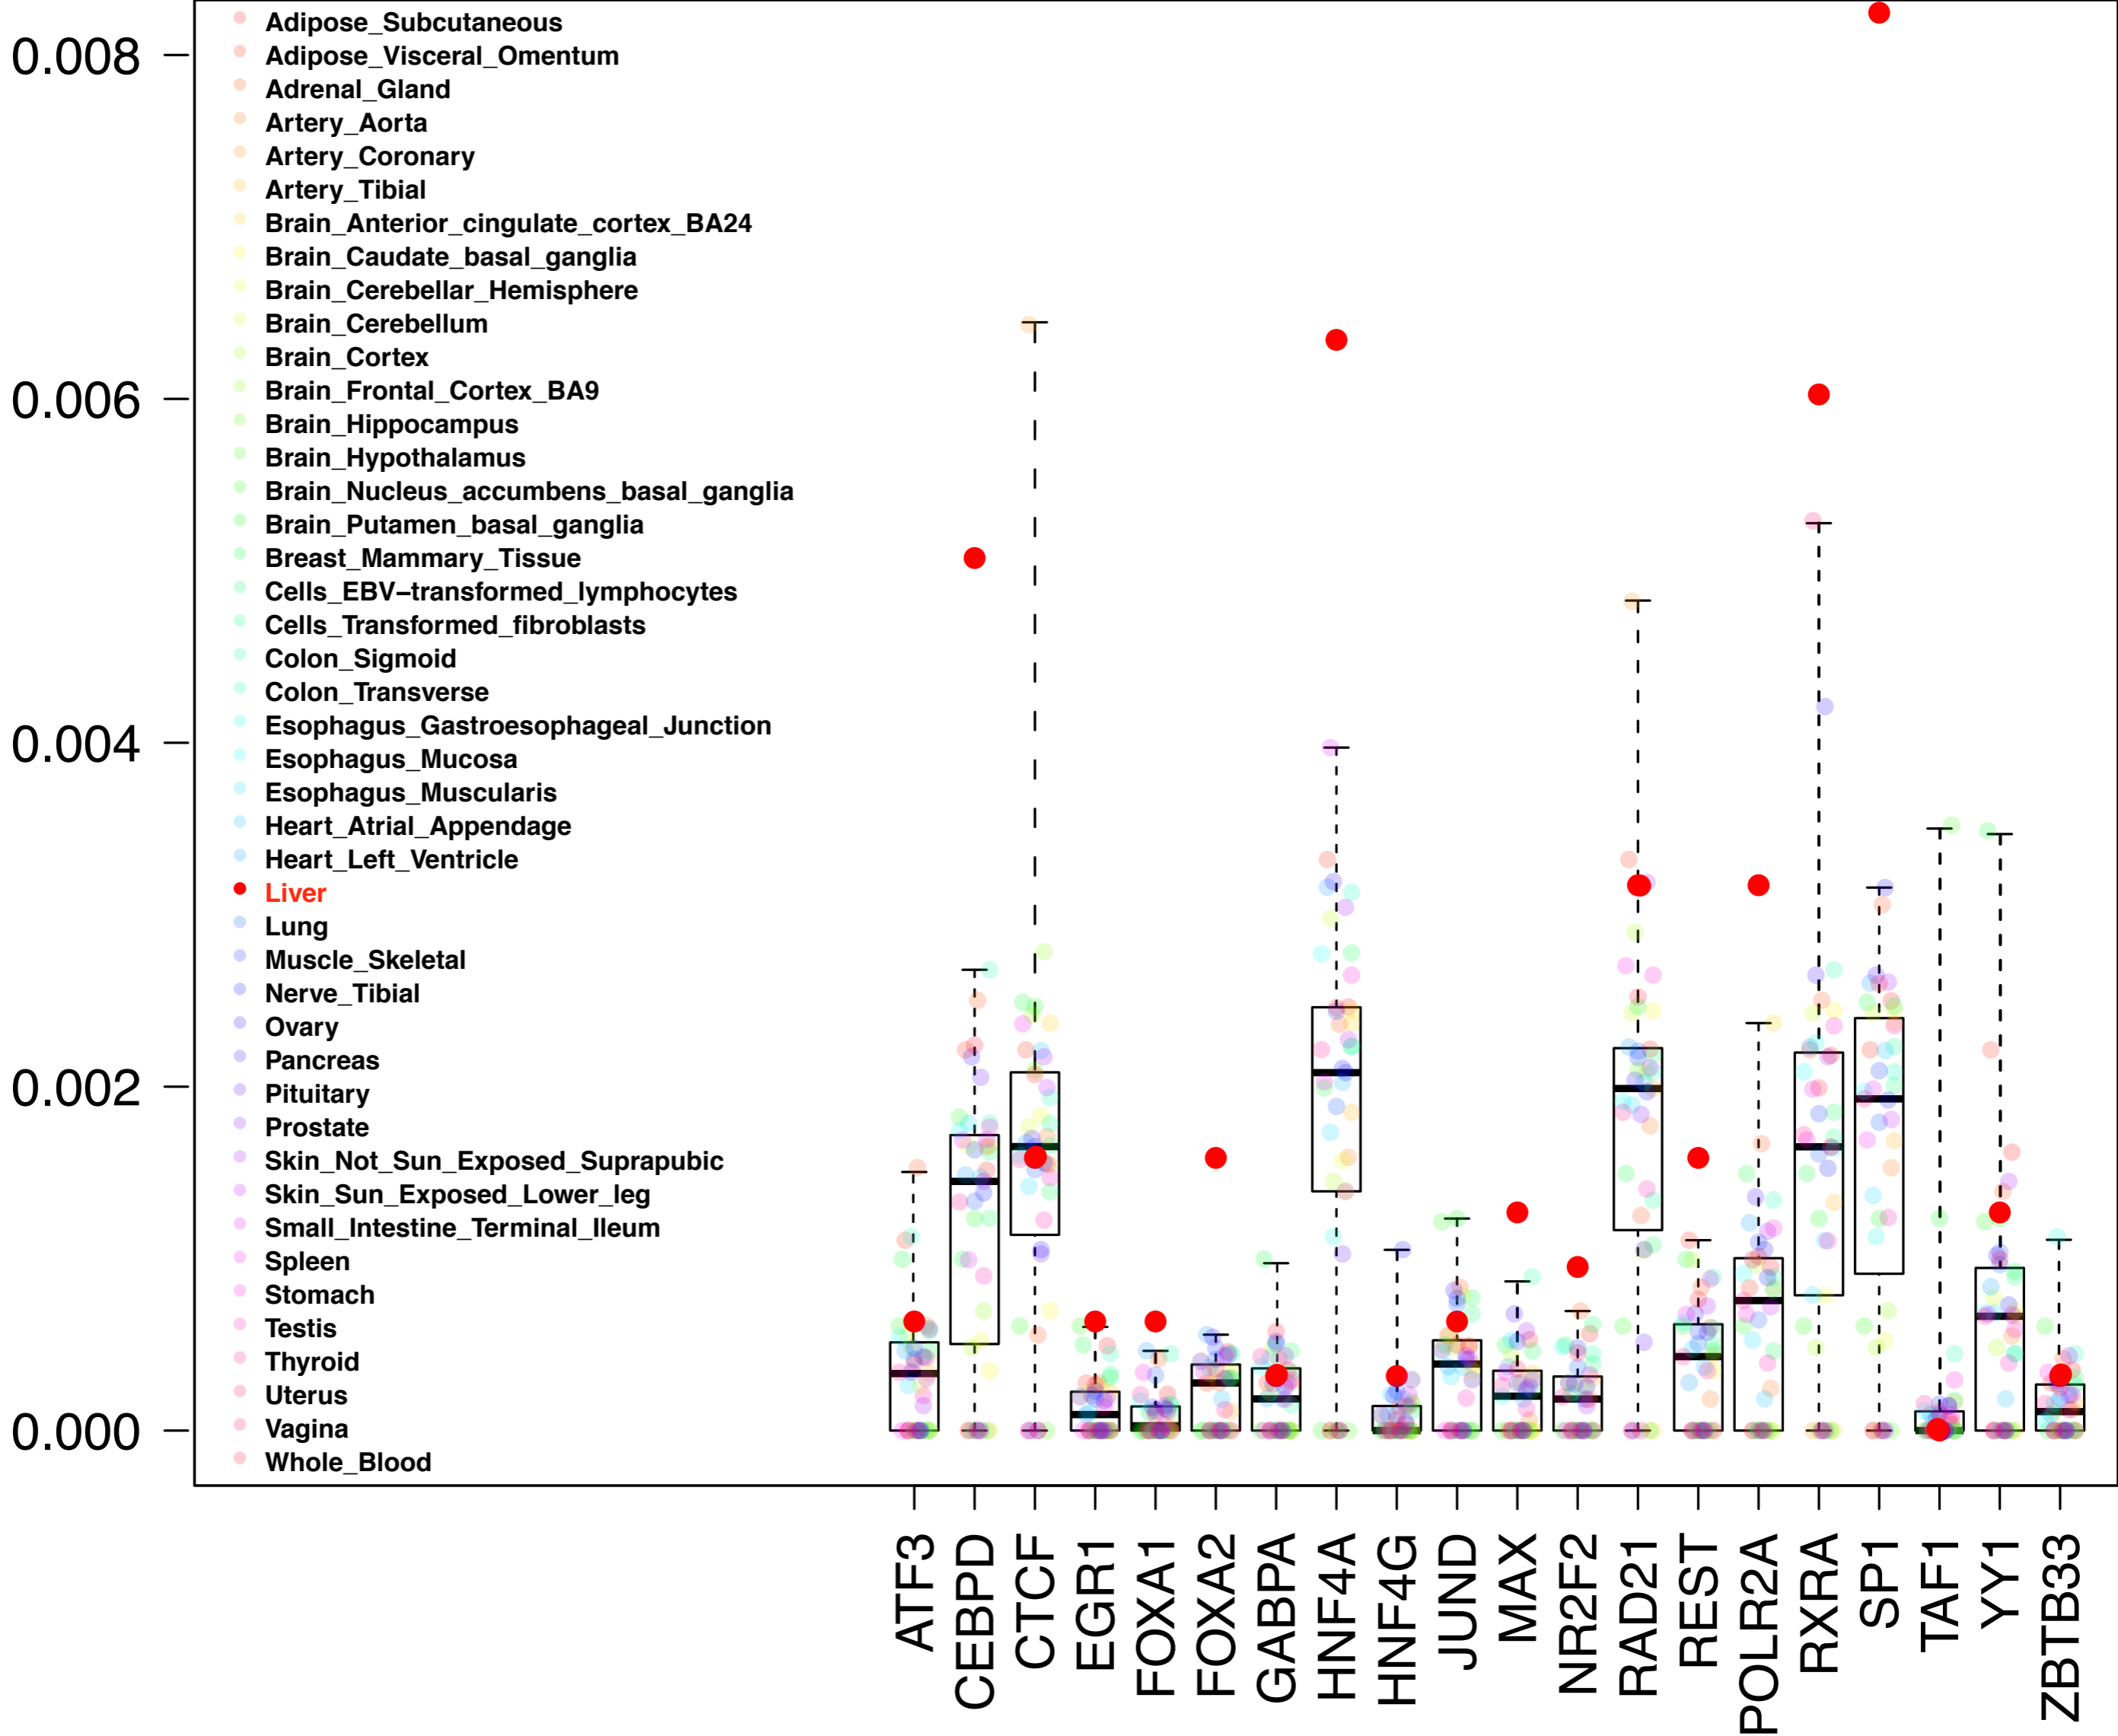

Supplemental\_Fig\_S13. Red dot indicates the percent of liver-specific eQTLs overlapping binding sites for each DAP relative to the boxplots representing the percent overlap of all other GTEx tissue-specific eQTLs.
