# Supplementary material for: A genome-wide interactome of DNA-associated proteins in the human liver
Source: PubMed Central journal article supplement — Genome Res. 2017 Nov;27(11):1950–60. doi: 10.1101/gr.222083.117 (PMC5668951; doi:10.1101/gr.222083.117), 2017-11
Supplement: supp_gr.222083.117_Supplemental_Fig_S14.pdf [file supp_gr.222083.117_Supplemental_Fig_S14.pdf]

**A****Number of eQTL Overlapping Peaks**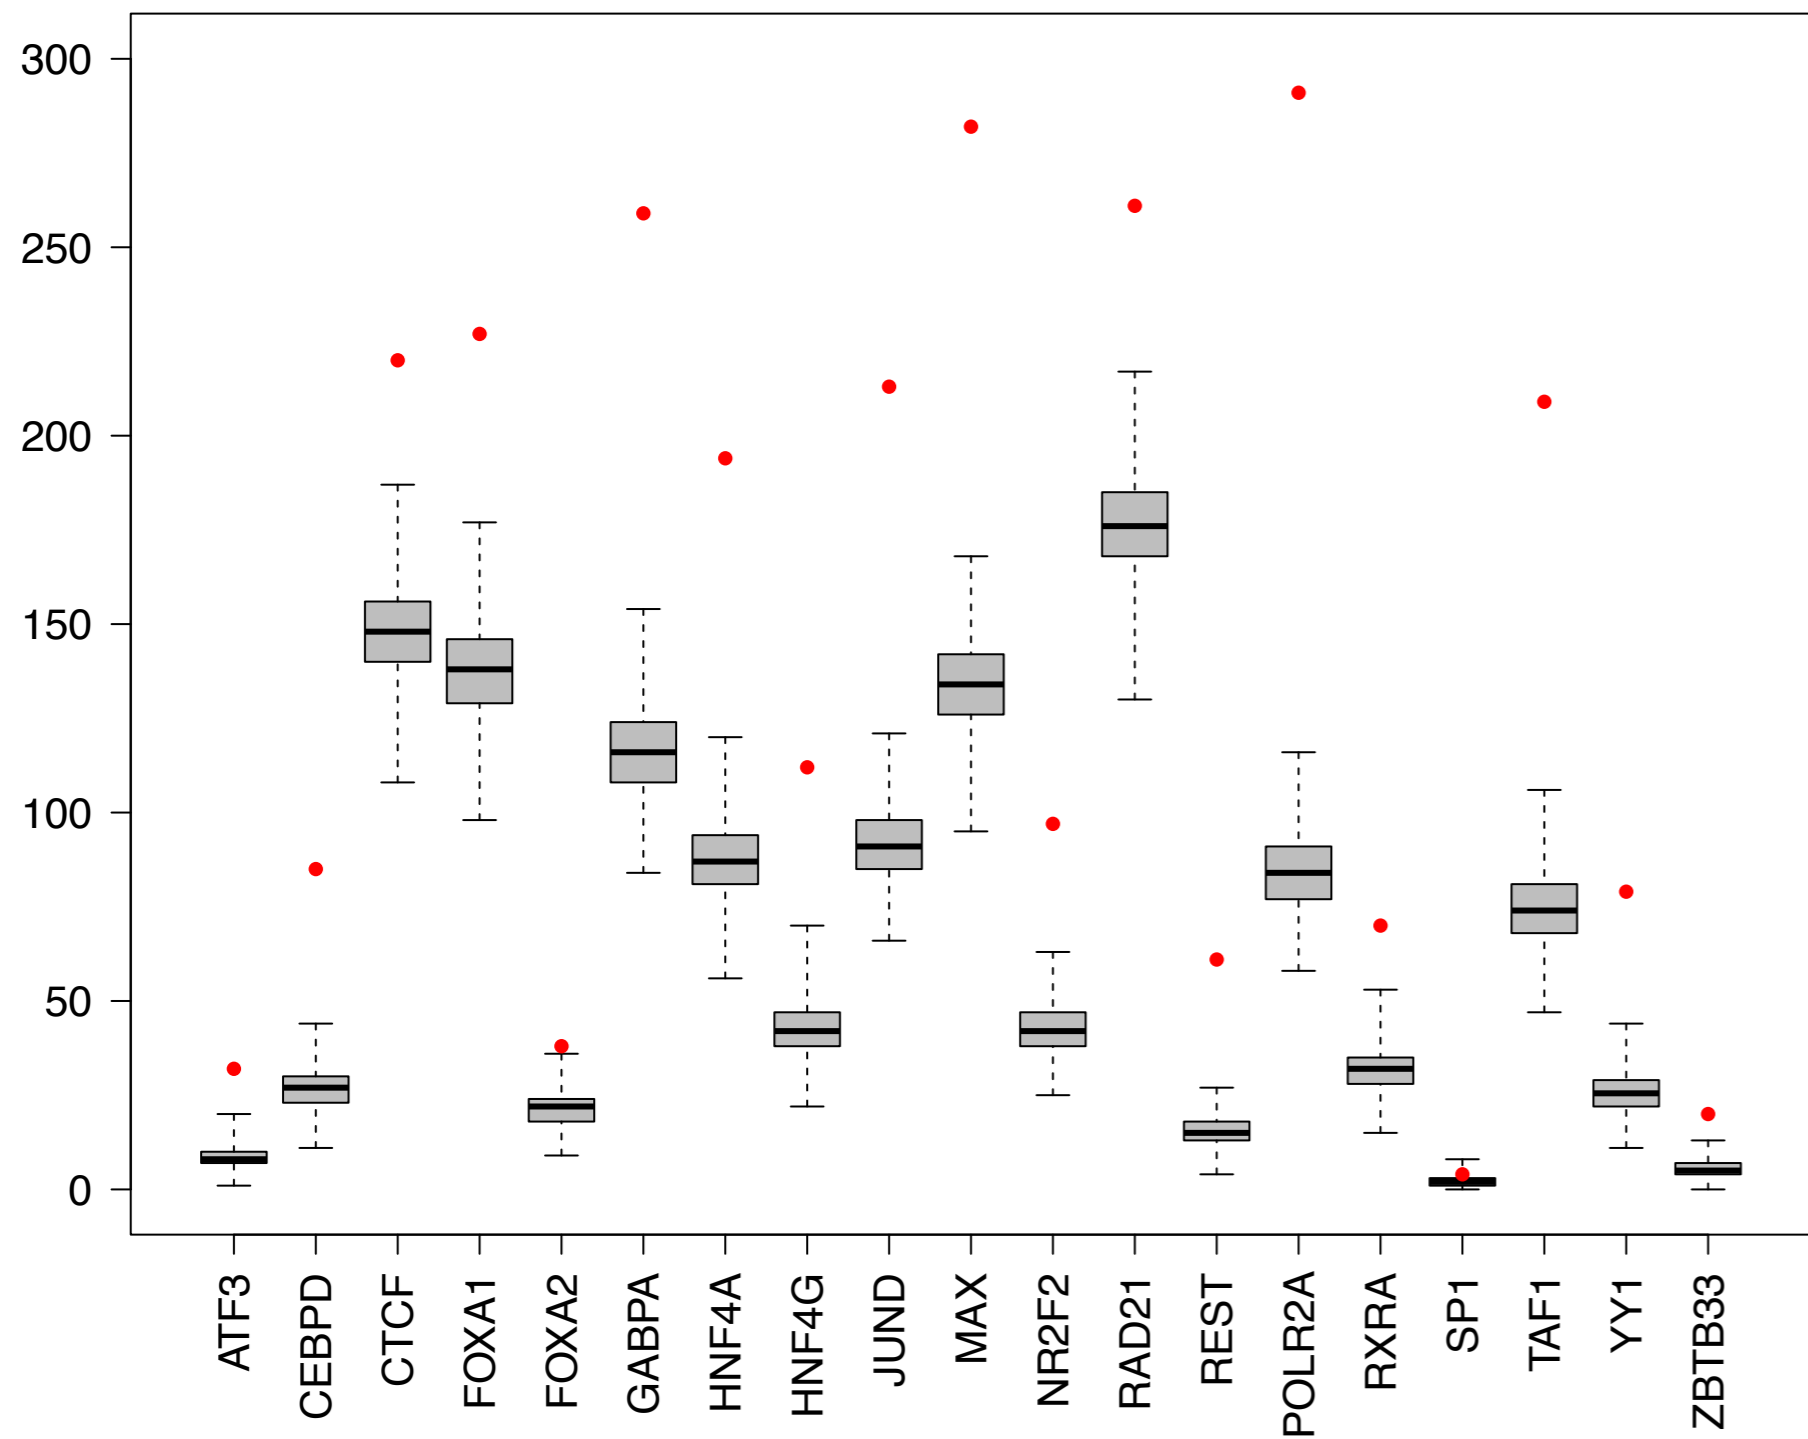**B****Percent of Tissue Specific eQTL SNPs Overlapping a Binding Site**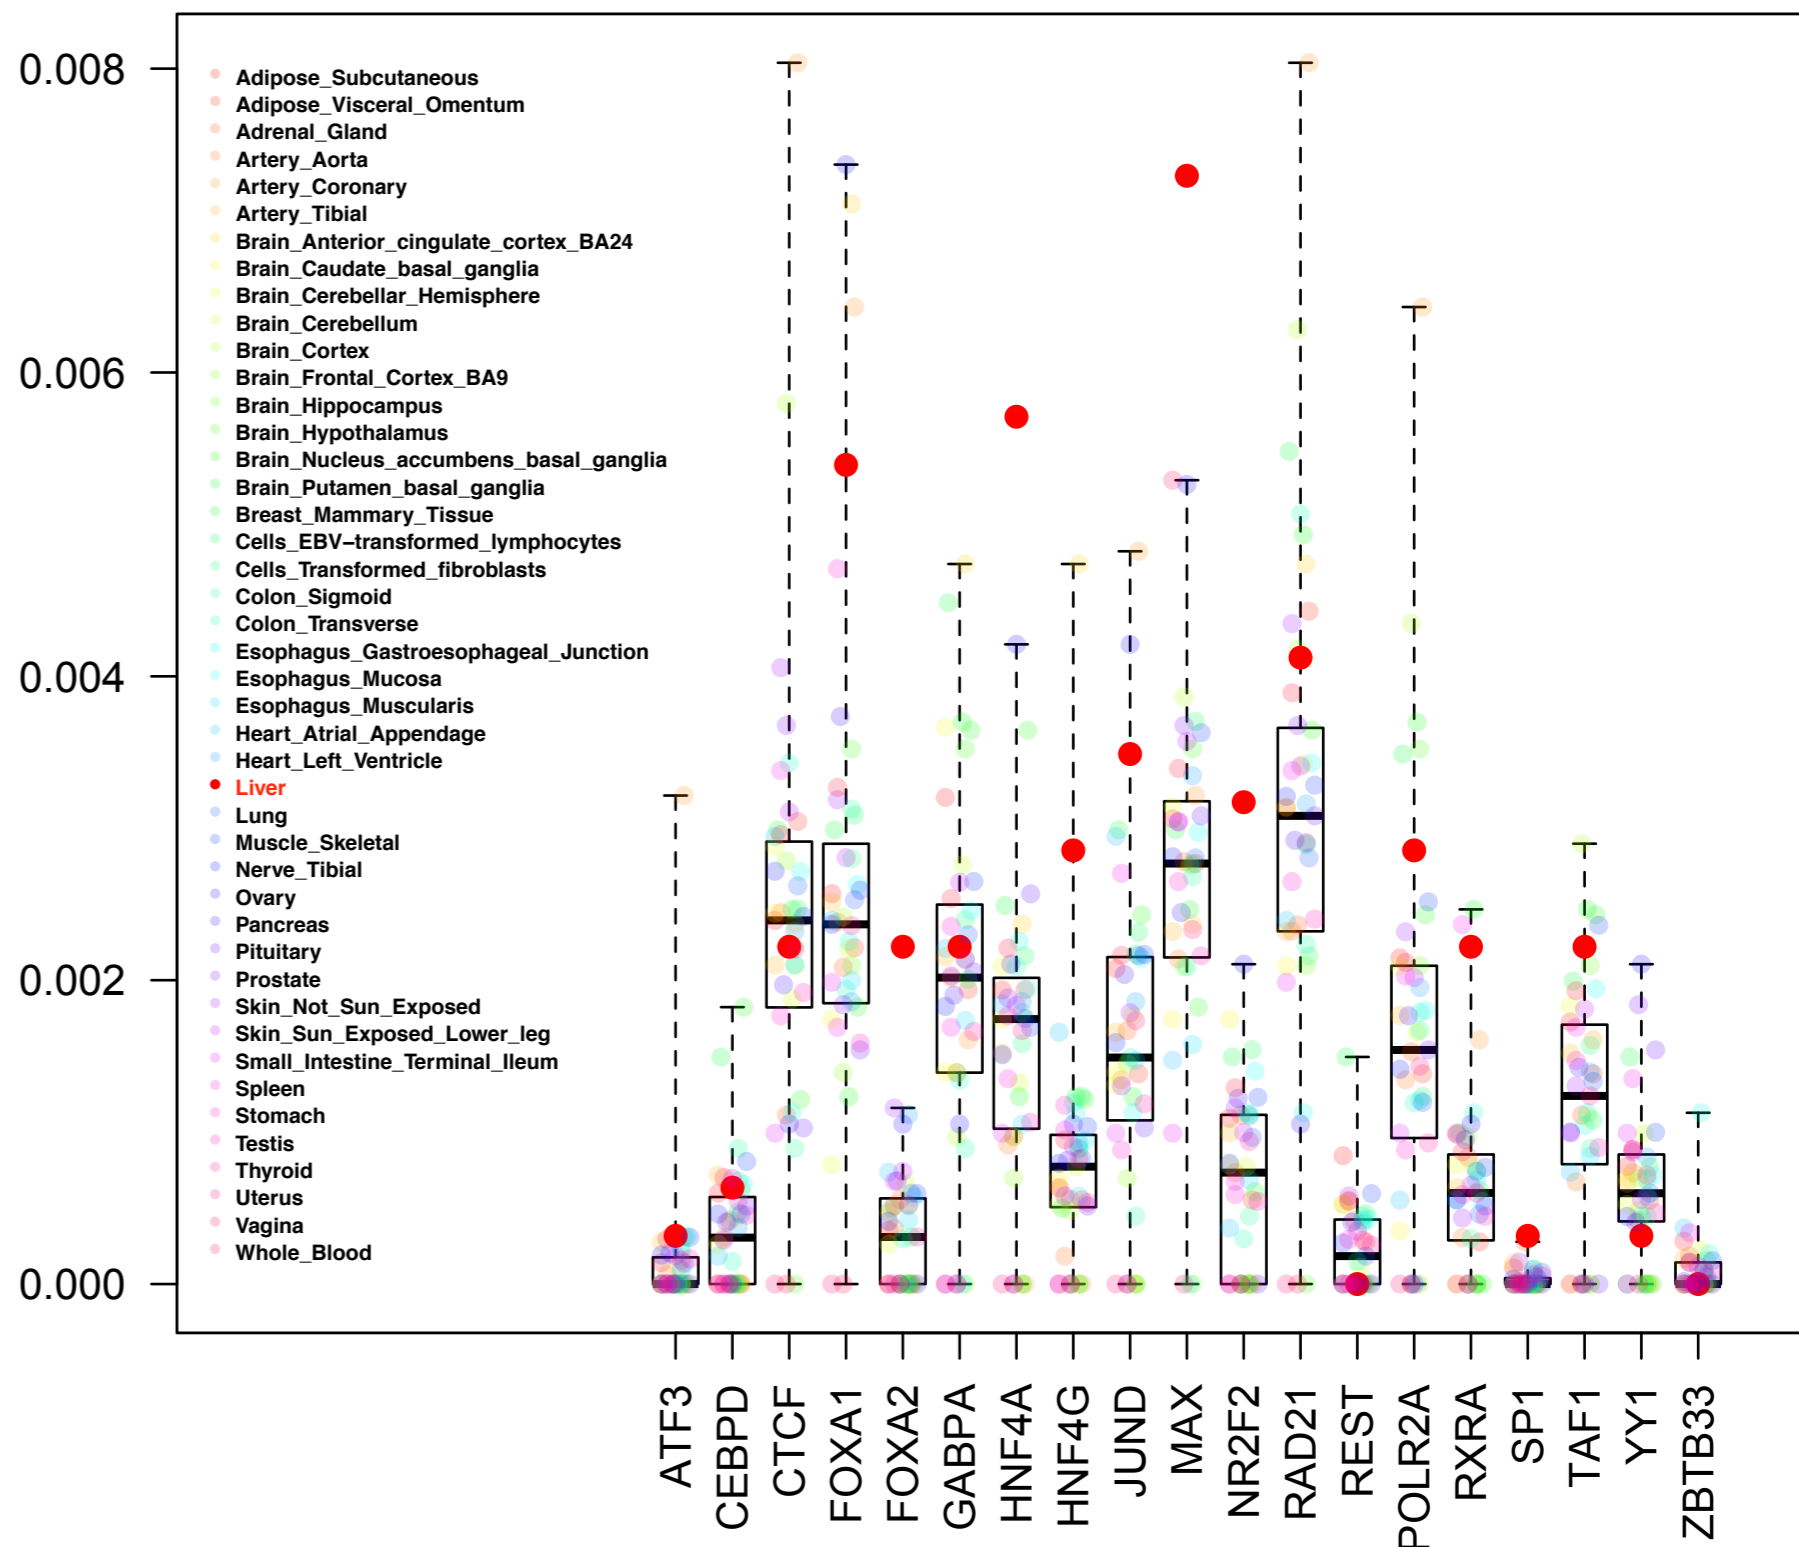

**Supplemental\_Fig\_S14.** (A) Red dot indicates the number of eQTLs falling within a HepG2 DAP binding site relative to the gray boxplots representing 1000 randomly sampled null SNPs matched for distance to TSS and minor allele frequency. Plot is the HepG2 complement to Figure 4A. (B) Red dot indicates the percent of liver-specific eQTLs overlapping binding sites for each HepG2 DAP relative to the boxplots representing the percent overlap of all other GTEx tissue-specific eQTLs. Plot is the HEPG2 complement to Figure 4B.
