# Supplementary material for: A genome-wide interactome of DNA-associated proteins in the human liver
Source: PubMed Central journal article supplement — Genome Res. 2017 Nov;27(11):1950–60. doi: 10.1101/gr.222083.117 (PMC5668951; doi:10.1101/gr.222083.117), 2017-11
Supplement: supp_gr.222083.117_Supplemental_Fig_S16.pdf [file supp_gr.222083.117_Supplemental_Fig_S16.pdf]

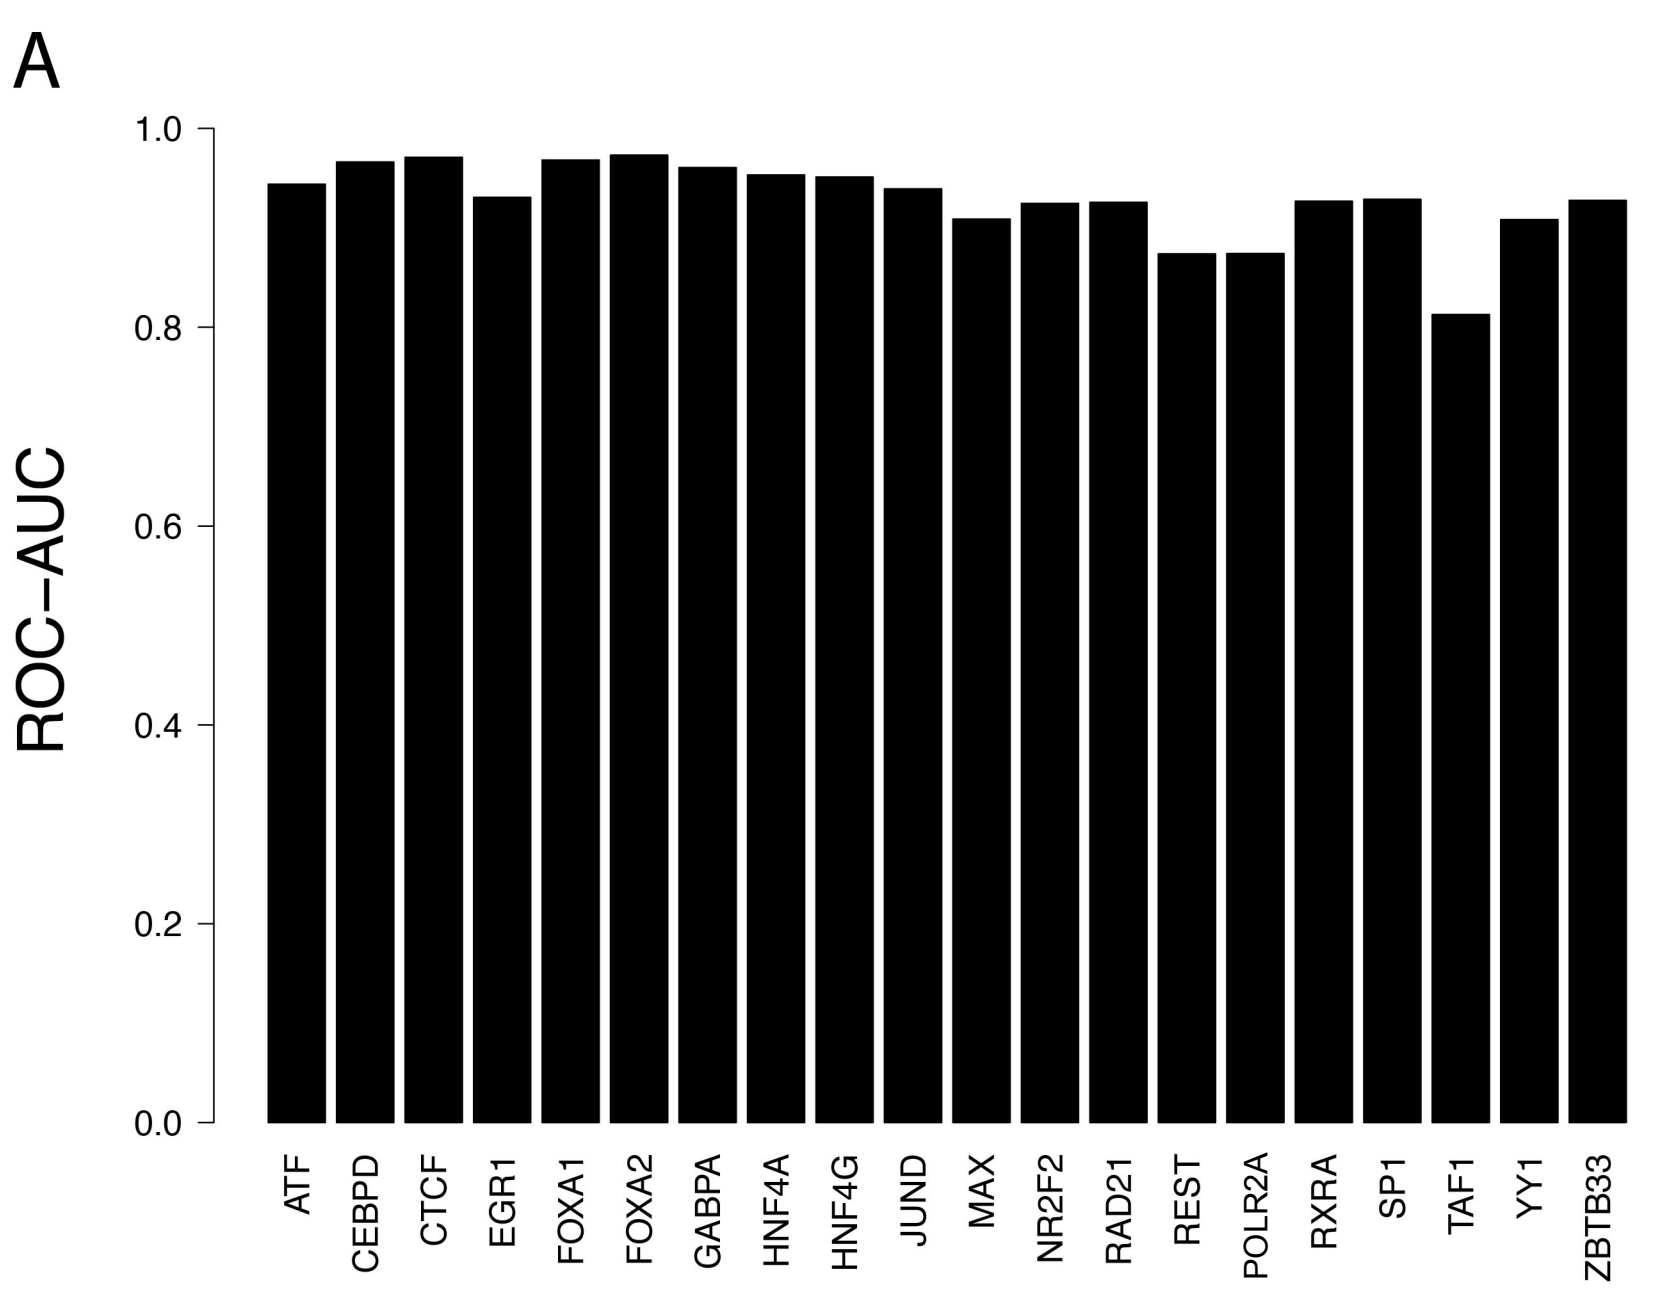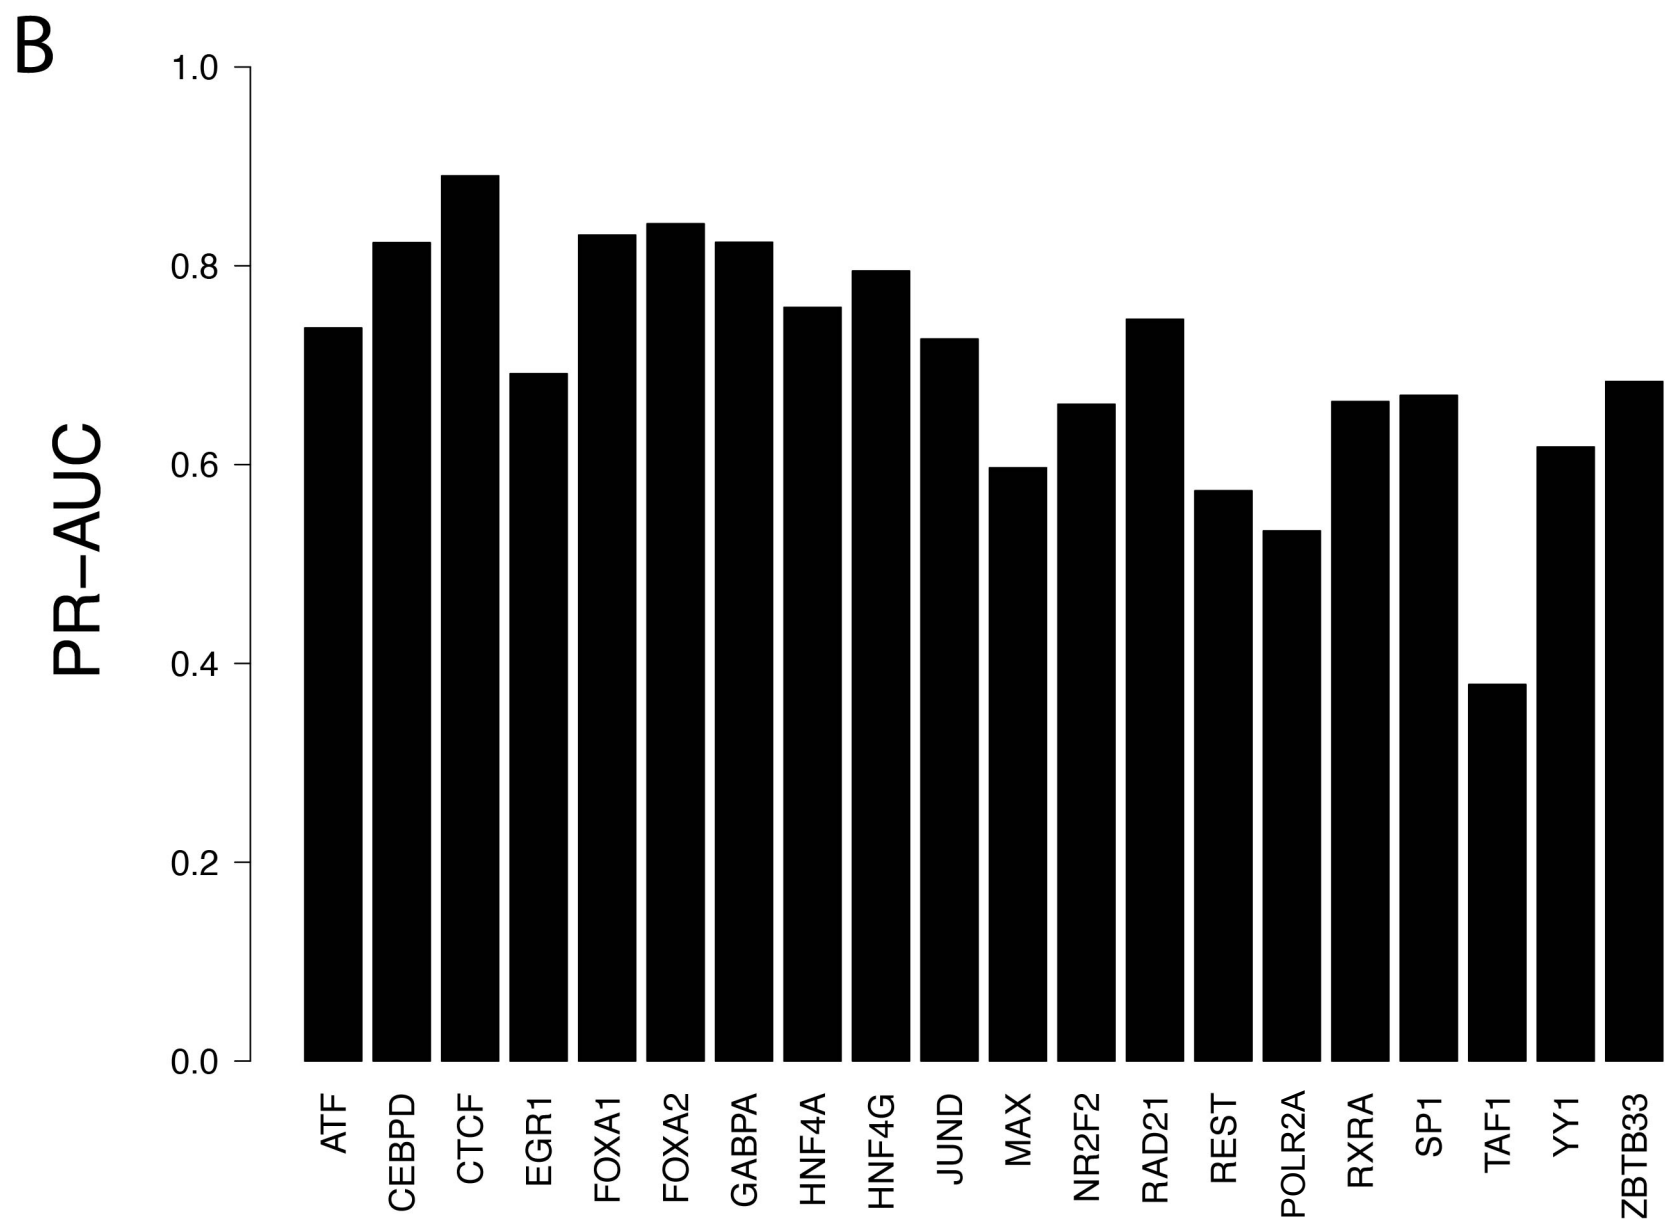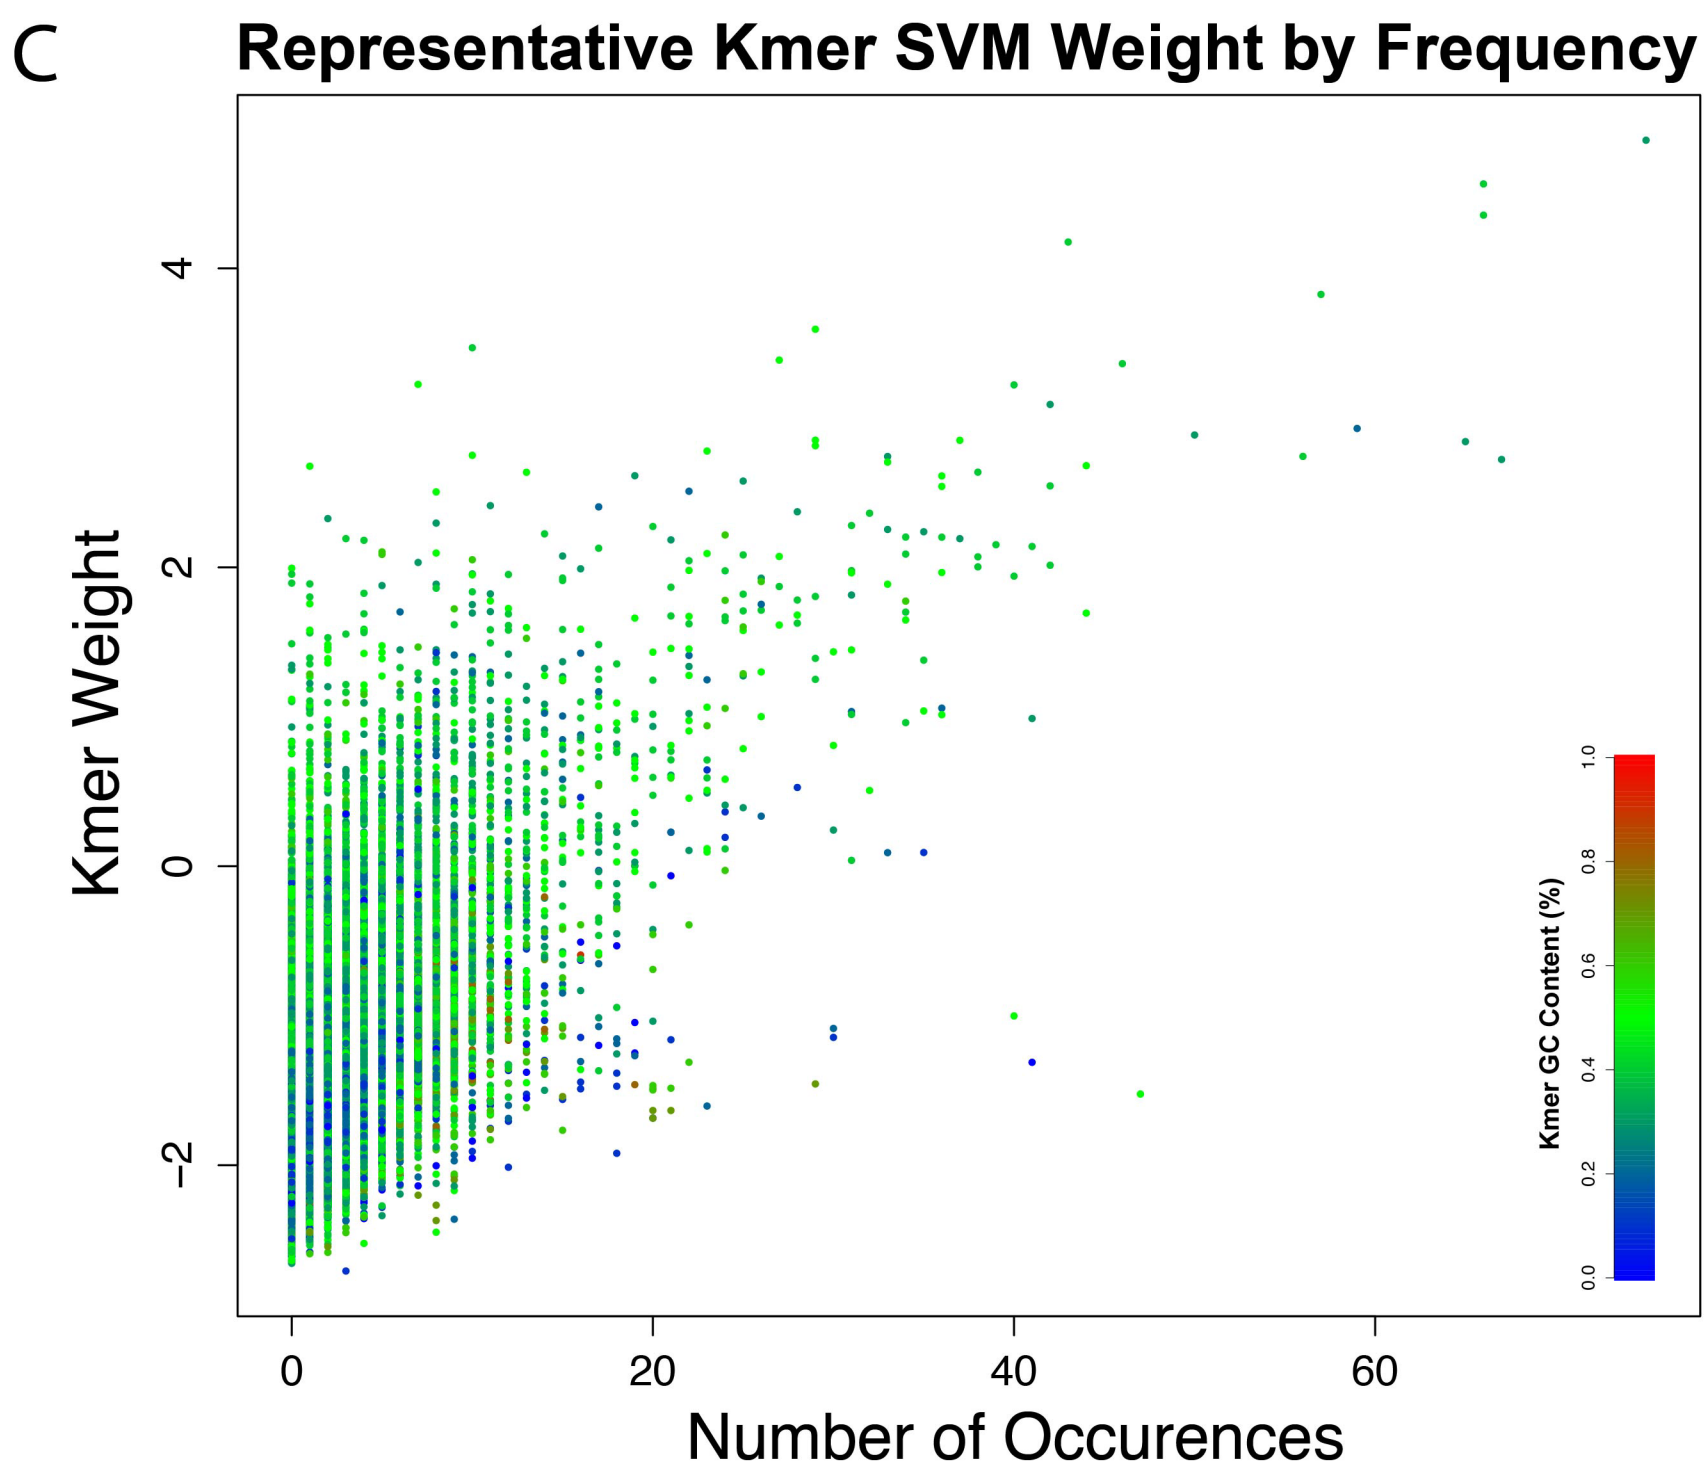

**Supplemental\_Fig\_S16.** (A) ROC curve AUC values for SVMs trained on each DAP. (B) Precision-recall curve AUC vales for SVMs trained on each DAP. Representative plot for SVM models in ATF3. Plots the frequency of each 10mer in ATF3 binding sites against its SVM weight. Color of each point reflects the GC content of the 10-mer.
