# Supplementary material for: A genome-wide interactome of DNA-associated proteins in the human liver
Source: PubMed Central journal article supplement — Genome Res. 2017 Nov;27(11):1950–60. doi: 10.1101/gr.222083.117 (PMC5668951; doi:10.1101/gr.222083.117), 2017-11
Supplement: supp_gr.222083.117_Supplemental_Fig_S17.pdf [file supp_gr.222083.117_Supplemental_Fig_S17.pdf]

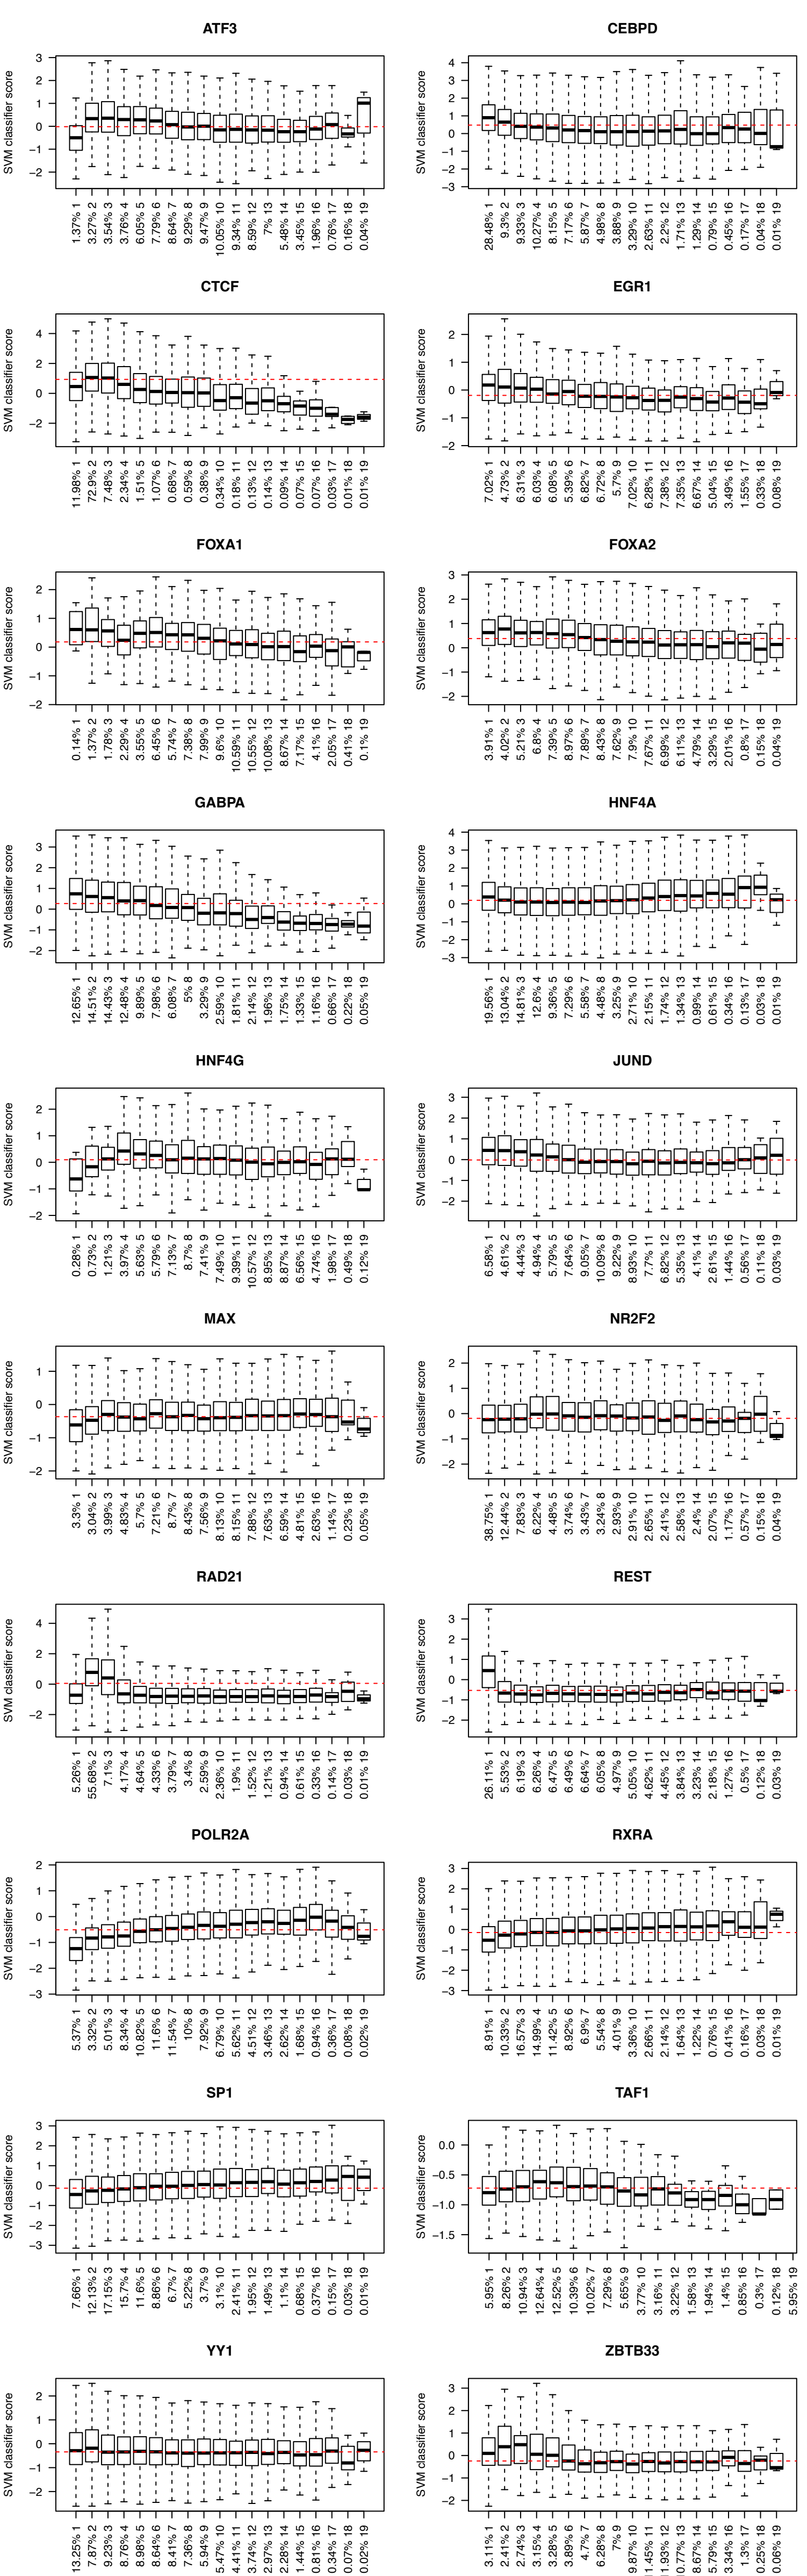

**Supplemental\_Fig\_S17.** Boxplots indicating mean SVM cross validation classifier values for each DAP binding site partitioned by the degree of co-occupancy. X-axis tick labels indicate the number of co-bound DAPs and the percentage of total binding sites represented. The dashed red line indicates the median classifier value for all binding sites.
