# Supplementary material for: A genome-wide interactome of DNA-associated proteins in the human liver
Source: PubMed Central journal article supplement — Genome Res. 2017 Nov;27(11):1950–60. doi: 10.1101/gr.222083.117 (PMC5668951; doi:10.1101/gr.222083.117), 2017-11
Supplement: supp_gr.222083.117_Supplemental_Fig_S20.pdf [file supp_gr.222083.117_Supplemental_Fig_S20.pdf]

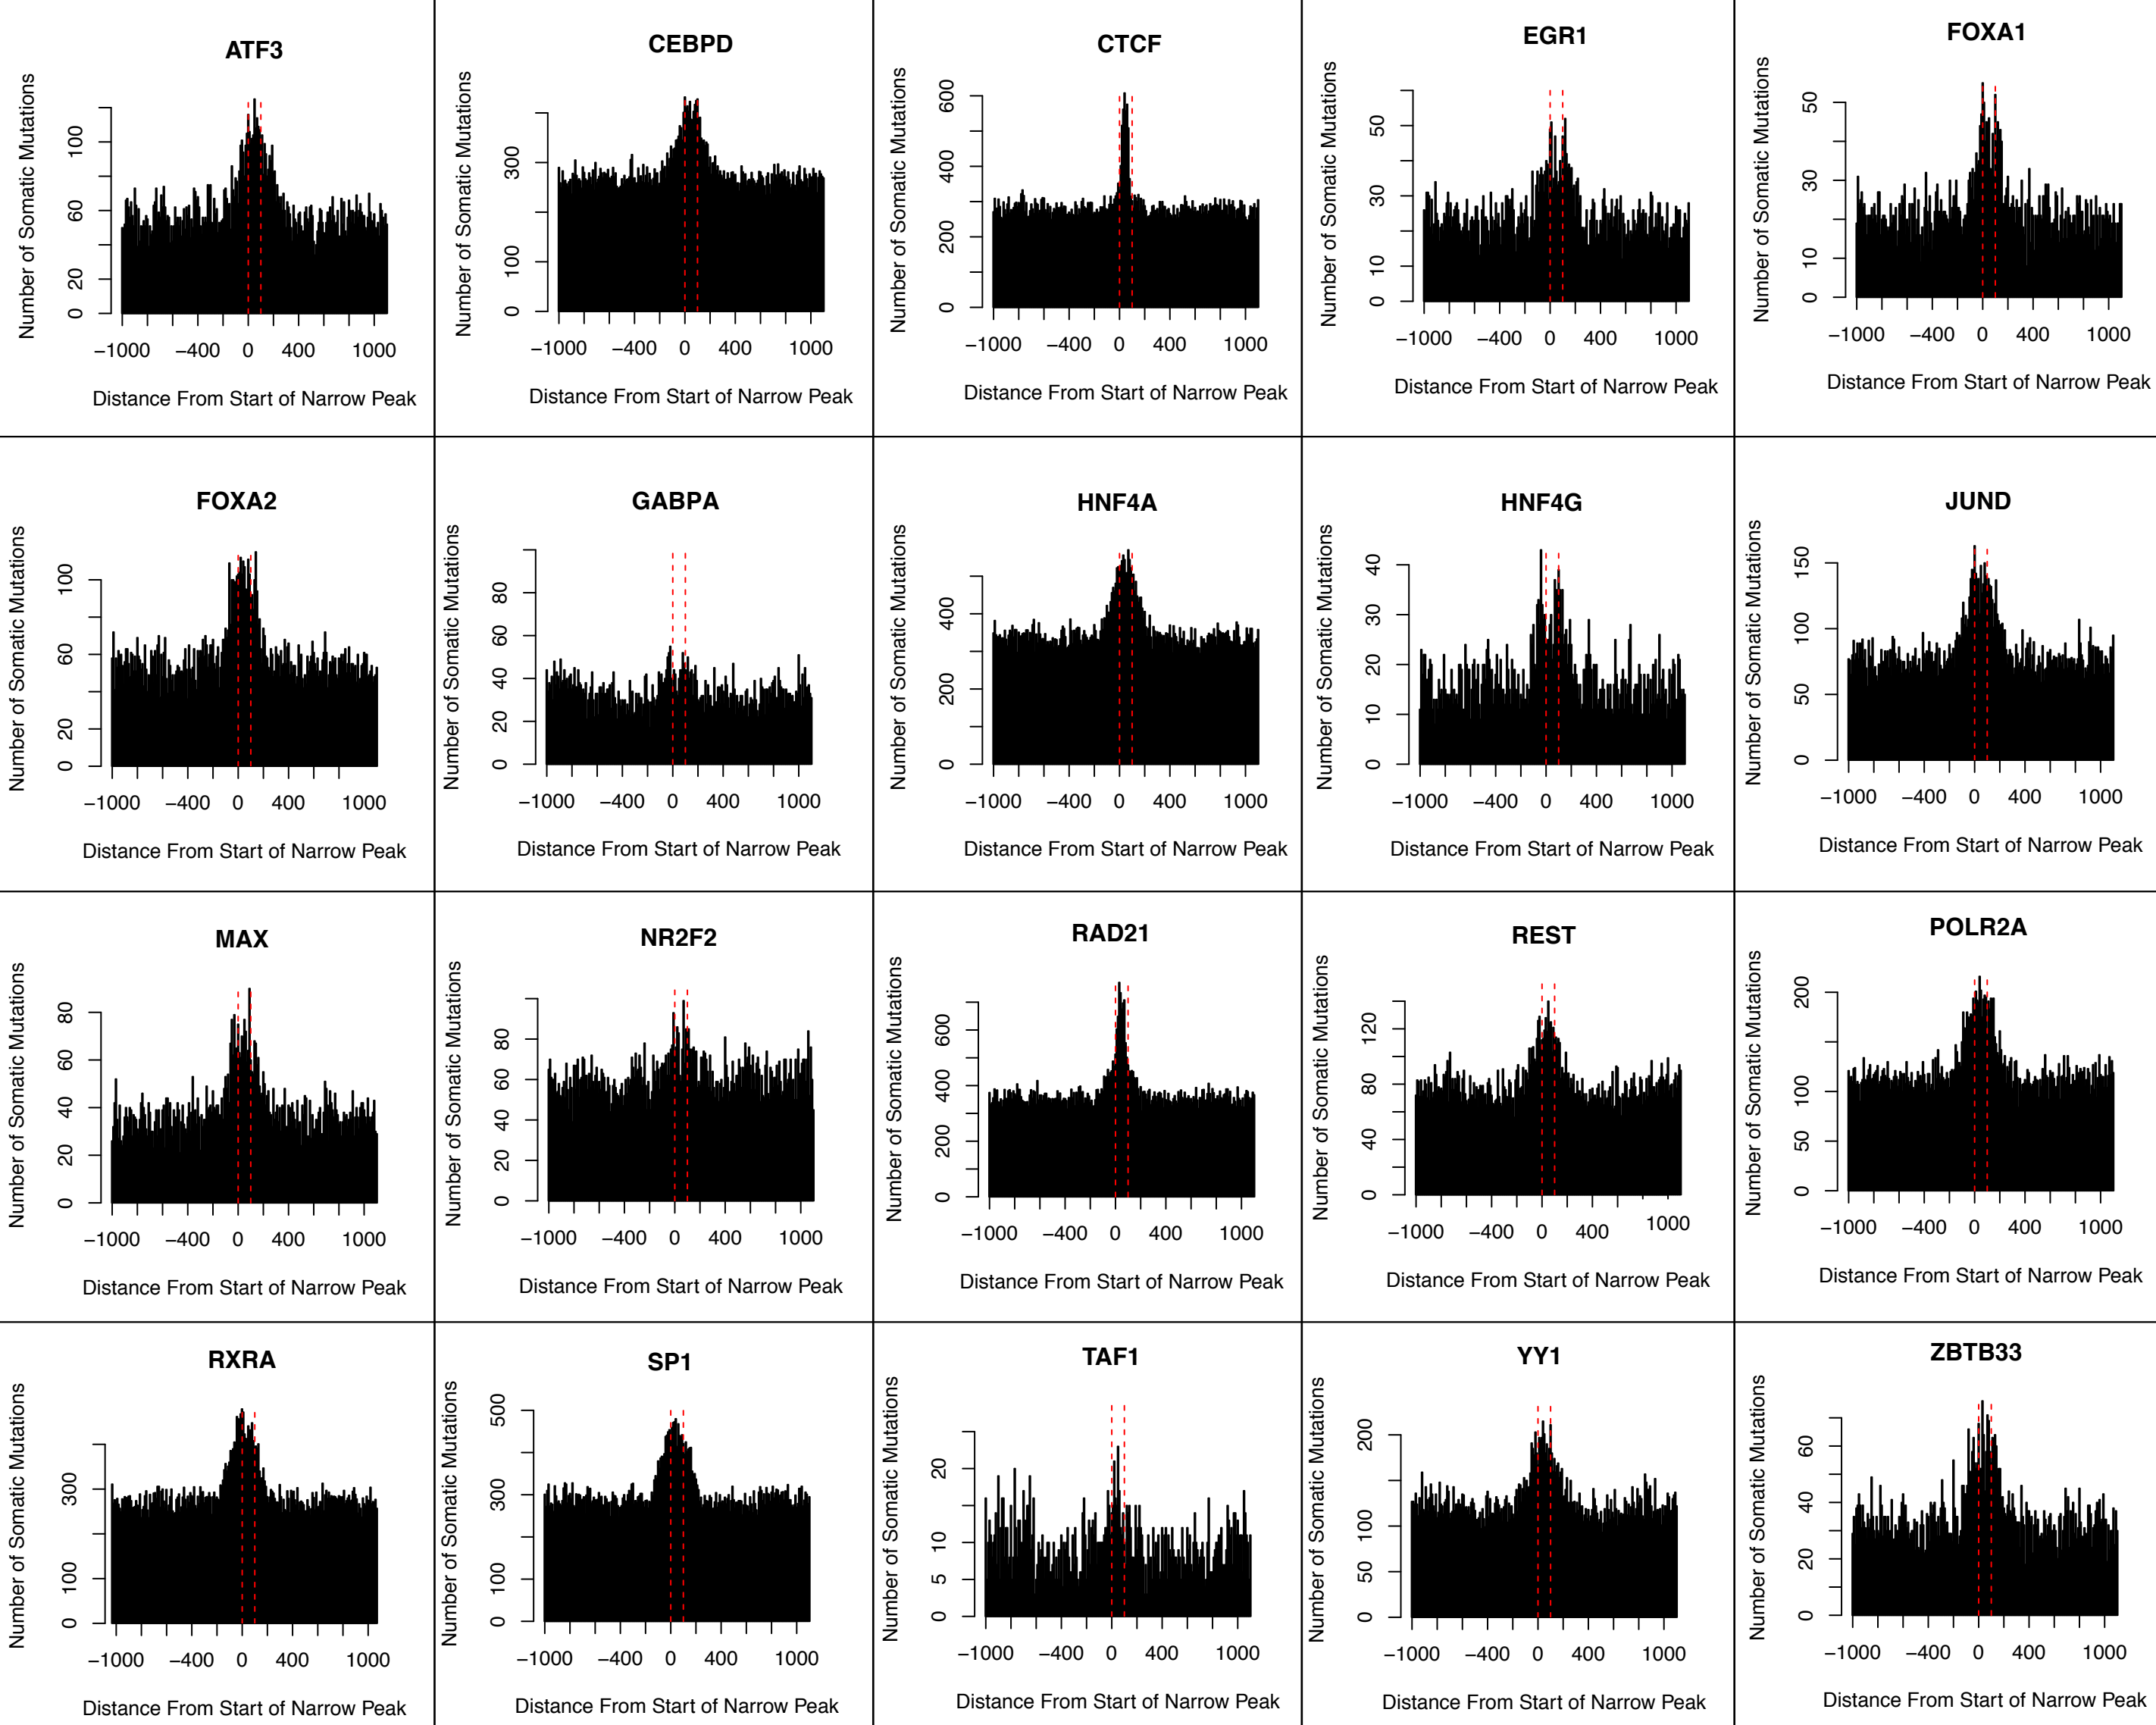

**Supplemental\_Fig\_S20.** Panels for each DAP showing the number of cancer somatic mutations observed in each DAP peak and flanking 1Kb region. Each bar represents the total number of mutations observed for a given 10bp window across all binding sites.
