# Supplementary material for: A genome-wide interactome of DNA-associated proteins in the human liver
Source: PubMed Central journal article supplement — Genome Res. 2017 Nov;27(11):1950–60. doi: 10.1101/gr.222083.117 (PMC5668951; doi:10.1101/gr.222083.117), 2017-11
Supplement: supp_gr.222083.117_Supplemental_Fig_S21.pdf [file supp_gr.222083.117_Supplemental_Fig_S21.pdf]

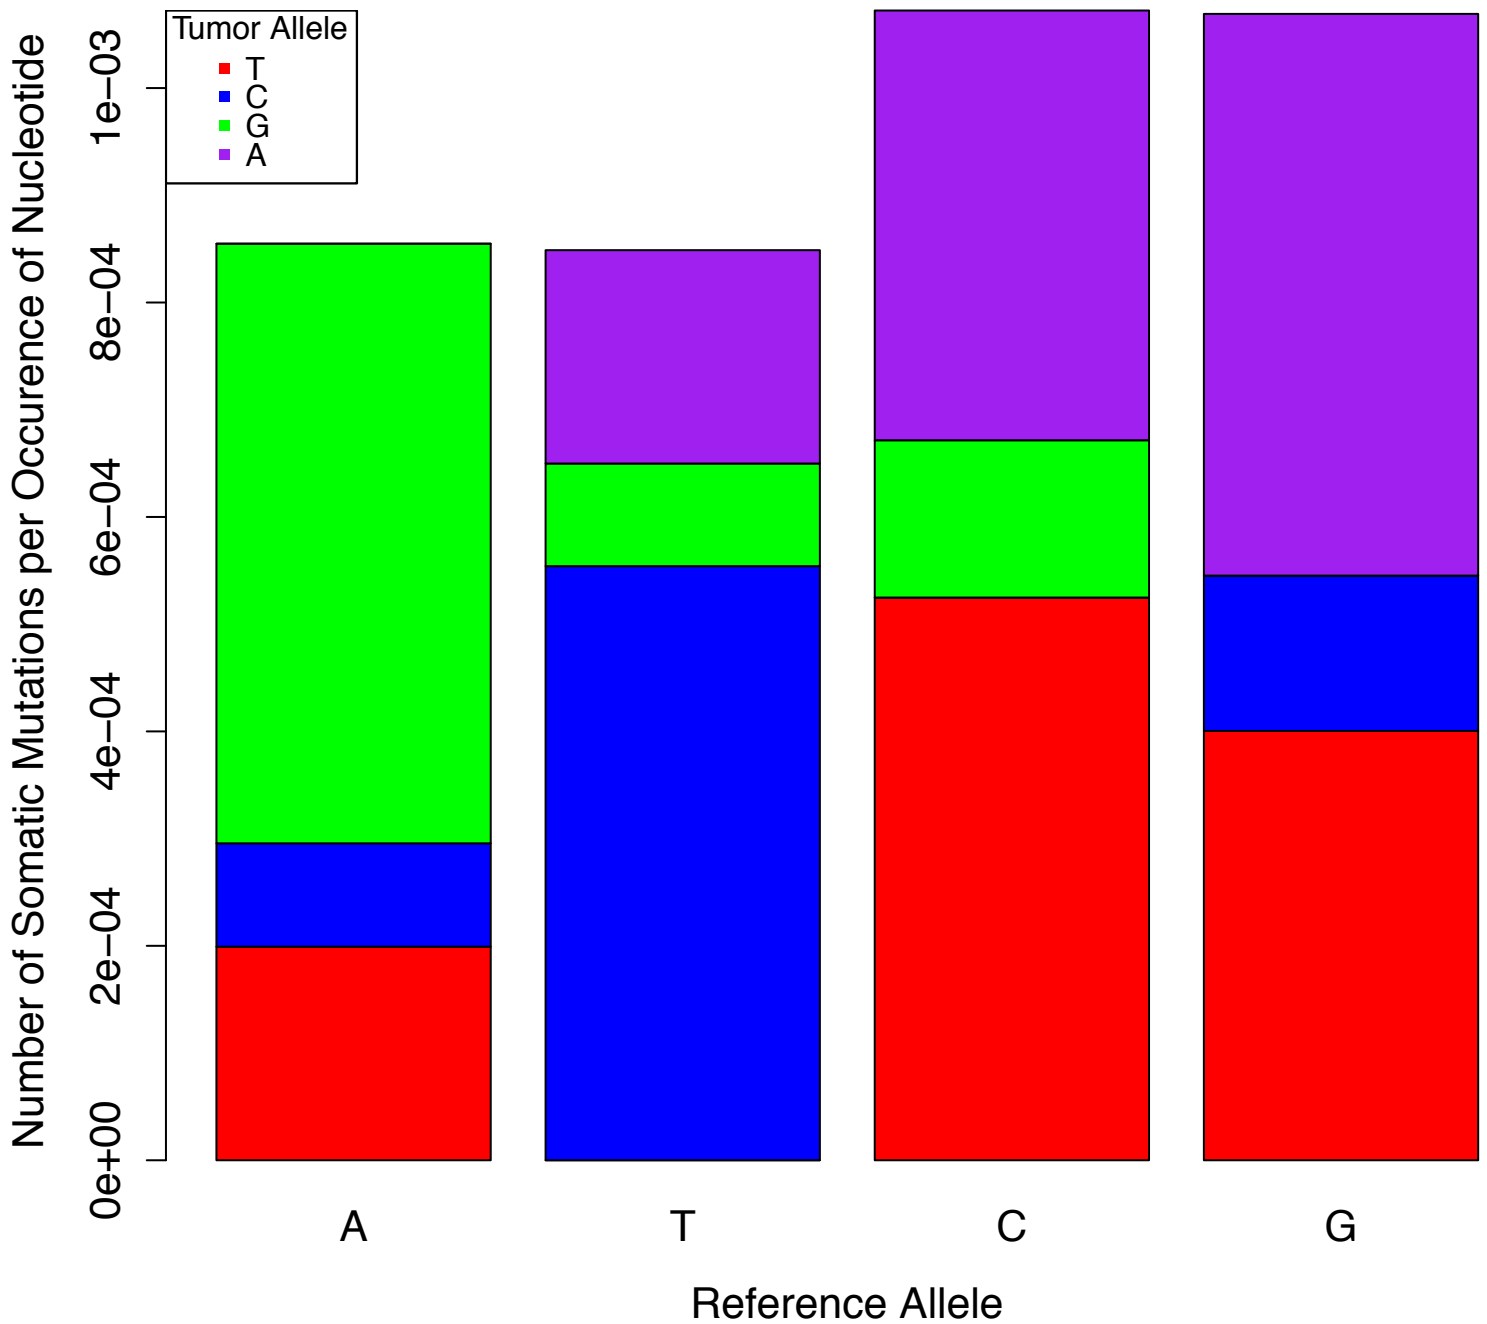

**Supplemental\_Fig\_S21.** The number of liver cancer somatic mutations observed for each nucleotide per occurrence of that nucleotide in the genome. Colors within each bar represent the proportion of nucleotides to which the reference allele is mutated.
