# Supplementary material for: A genome-wide interactome of DNA-associated proteins in the human liver
Source: HighWire-hosted journal article supplement (doi:10.1101/gr.222083.117), 2017-10-11
Supplement: Supplemental_Info_081117.docx [file Supplemental_Info_081117.docx]

**SUPPLEMENTAL METHODS**

*Tissue procurement*

Liver tissue was obtained from both deceased donors and flash frozen with liquid nitrogen at the time of organ procurement through Mid-America Transplant Services/Washington University (St. Louis, MO). Research consents from donor families were obtained.

*Chromatin immunoprecipitation and next-generation sequencing*

ChIP-seq experimentation was performed using a previously established method (Savic et al. 2013). Briefly, for each ChIP-seq replicate in each liver, an independent dry pulverization was performed in Covaris tissueTUBES attached to glass vials. After pulverization, tissue was collected in the attached vial, fixed, washed, and stored as a pellet at -80oC. To avoid bias from batch effects, each replicate for each ChIP experiment was prepped together in a single batch (resulting in two total batches) and the ChIP assay and subsequent library preparations were conducted as previously reported (Reddy et al. 2012). Antibodies used for ChIP-seq assays are listed in Supplemental Table 16. All antibodies have been previously used in conjunction with cell line based ChIP experiments conducted at HudsonAlpha and made publically available through the ENCODE Project. All ChIP-seq libraries were run on an Illumina HiSeq2500 sequencer using 50bp single-end sequencing. Binding sites were identified using the MACS peak caller using an mfold cutoff of 15 (Zhang et al. 2008) while enriched binding motifs were identified through MEME (Bailey et al. 2009). Narrow peaks were defined as 100bp segments of DNA centered on the peak summit. ChIP-seq replicates were used to identify concordant peaks for downstream analysis. Concordant peaks were defined as narrow peaks that were present in both replicate and overlapped by at least one base pair.

*DAP-interaction analysis*

Normalized binding intensity at the union of all narrow peak DAP binding sites in each tissue was obtained by merging all narrow peaks, determining the total number of reads that were mapped to each merged region for each ChIP experiment, normalizing these values by the total number of reads mapped for each ChIP experiment (in other words, converted to reads per million), and constructing a Spearman correlation matrix for all factors in each tissue (Quinlan 2014). To identify DAP binding clusters, hierarchical clustering was performed on the correlation matrices for all pair-wise factor combinations and plotted as a heatmap. The correlation matrix was also used to construct a network diagram of DAP interactions with the R package “qgraph” (Epskamp et al. 2012). Histone modifications were obtained from the Epigenome Roadmap Project (Consortium et al. 2015). The total amount of genome covered by merged narrow peaks from the adult liver was compared to an equivalent number of matched null sequences generated from the Beer Lab galaxy (<http://kmersvm.beerlab.org>) “Generate Null Sequence” function allowing 2% repeat and GC content error. To assess conservation at binding sites with increasing numbers of DAPs bound, narrow peaks were first merged in a manner that tracked the number of overlapping factors bound at a given site. Next, mean GERP scores were determined for each site using base-wise GERP rejected substitution scores from the Sidow lab website (<http://mendel.stanford.edu/SidowLab/downloads/gerp/hg19.GERP_scores.tar.gz>). To obtain histone modification intensities at each merged peak, BigWig files were obtained for adult liver tissue from the Epigenome Roadmap data portal (<http://egg2.wustl.edu/roadmap/web_portal/>) and converted to BEDgraph files with the UCSC genome browser (https://genome.ucsc.edu/goldenpath/help/bigWig.html) “bigWigtoBedGraph” function. Mean BedGraph intensities, calculated as fold change over a reverse cross-linked control, were calculated for each merged peak. Each DAPs relative overlap with a histone mark was calculated by obtaining liver tissue narrow peak BED files for each histone modification from the data portal and calculating the fraction of DAP narrow peaks that overlapped with a given histone modification peak.

*Whole-genome sequencing and allele-specific binding analysis*

10X Chromium, whole genome sequencing and phased BAM and VCF files were generated from frozen liver tissue from each donor via the 10X genomics longranger pipeline by the HudsonAlpha Genomic Services Lab (<https://gsl.hudsonalpha.org/information/10X>). Allele bias in the adult liver was assessed with ChIP-seq data using the R package “BaalChIP” (DeSantiago et al. 2016). BaalChIP requires binary alignment/map (BAM) files generated from replicate ChIP-seq experiments, a BAM file from genomic DNA (gDNA) sequenced, and a VCF file with heterozygous SNPs overlapping previously called ChIP-seq binding sites. BaalChIP calculates expected allele frequencies from gDNA BAM files, filters SNPs with “MAPQ” value <15 and “QUAL”<10, filters SNPs in regions with UCSC mappability scores<1 or present in UCSC blacklisted mappability tracks and repeat regions, adjusts for reference mapping bias, filters possible homozygous SNPs, and uses a beta-binomial Bayesian model to detect allele specific binding events. BaalChIP output consists of corrected allelic ratios of reads overlapping each heterozygous SNP and a Boolean variable indicating whether significant allele bias was detected at SNP. A pair-wise Spearman correlation matrix was generated comparing allele bias at SNPs passing BaalChIP quality filters for each pair of factors. At least 25 peaks had to pass quality filters for a pair of factors to be included in the analysis (30 out of 380 possible pairs were removed).

*RNA extraction and sequencing and alignment*

Four independent tissue pulverization, as described previously, were performed on each liver. RNA was extracted from pulverized samples using Qiagen RLT buffer +1% BME. RNA was purified from 350 uL of tissue lysate using the Norgen Animal Tissue RNA purification kit. RNA-seq libraries were generated using Tn-RNA-seq, a transposase-mediated construction method, as previously described (Gertz et al. 2012b). All replicates were prepped in a single batch and and sequenced using an Illumina HiSeq 2500 to generate 50bp paired-end reads. Sequencing reads were aligned using a previously described pipeline (Alonso et al. 2017). Briefly, reads were trimmed using TrimGalore with default settings prior to being aligned and converted into a raw count table using STAR (Dobin et al. 2012). Percent unique alignment was consistent across samples and ranged from 75 to 81% uniquely aligned reads. Transcripts were aligned to hg19 reference genome and the genomic coordinates of all transcripts were obtained from the Ensembl genome browser (http://useast.ensembl.org/index.html) grch37_E75 gene transfer format (GTF) file. Gene expression levels were normalized to transcript length as well as total read depth, and expressed as transcripts per kilobase million (TPM).

*Allele-specific expression analysis*

Allele specific expression was calculated for each expressed heterozygous SNP using the GATK “ASEReadCounter” function according to previously described best practices (Castel et al. 2015). SNPs with a read depth less than 10, less than 5 reads assigned to each allele, had a “MAPQ” value <10 and “QUAL” value <2, and had a UCSC genome browser mappability score <1 were filtered prior to analysis. A simple binomial test using the R “binom.test” was performed to assess the significance of the observed number of reference reads out of the total number of reads at each SNP with the null ratio assumed to be the average genome-wide reference bias of 0.5397 after performing quality filtering. Only SNPs present within the same phase set (labeled PS within the phased .VCF file INFO column) were used in DAP-binding and expression allele bias correlations. Ninety-five percent confidence intervals for this analysis were generated by randomly shuffling DAP overlapping and expression SNP pairs that were within a given distance threshold and assessing the correlation 100 times.

*Gene set-ChIP binding proximity analysis*

Reactome pathway information was obtained from <http://www.reactome.org/pages/download-data/> (Fabregat et al. 2016). Promoter-proximal pathway enrichment was calculated as follows. For a given pathway, the distribution of distances from the TSS of each gene to the nearest binding site for a given factor was compared to the distribution of TSS to nearest binding site distances for the entire transcriptome as previously described (Savic et al. 2016) and significance was determined using the non-parametric Kologomorov-Smirnov test. Concordant narrow peaks that were present in all replicates from both livers were used for pathway analysis. Mean pathway expression was calculated as the mean TPM normalized expression for each gene in a given pathway. Median RPKM normalized expression levels of each transcript for each tissue were obtained from the GTEx data portal (GTEx_Analysis_v6p_RNA-seq_RNA-SeQCv1.1.8_gene_median_rpkm.gct.gz). Tissue specific transcripts were defined as transcripts that had an RPKM value greater than 2 and a 5-fold higher expression in a given tissue compared to the average expression in all remaining GTEx tissues. Replicate BAM files for each protein factor analyzed in our human tissue donors, except for EGR1, were obtained from previous work in our group in HepG2, which is publically available at the ENCODE data portal (<https://www.encodeproject.org>). BAM files were processed as described above for the liver tissue ChIP-seq experiments prior to analysis.

*DAP-binding site overlap with GTEX eQTL SNPs*

GTEx eQTL sites were obtained with permission from the GTEx project download portal “GTEx_Analysis_v6p_eQTL.tar” file. Binding site-eQTL overlaps were assessed with adult liver replicate concordant narrow peaks. Enrichment for liver eQTL overlap was assessed by comparing the observed significant (GTEx Q-value <0.05) eQTL overlap to 1000 random permutations of non-significant SNPs (GTEX Q-value>0.05) that passed the GTEx consortium quality filters. Null SNPs were matched to significant eQTL SNPs for distance to a TSS and minor allele frequency based on the Thousand Genomes Project data (<http://www.internationalgenome.org>). Matching was performed by binning SNPs into twenty quantiles based on distance to the nearest TSS and then separately binning SNPS into twenty quantiles based minor allele frequencies. Successive rounds of randomly sampling was then performed such that number of SNPs sampled from each bin was equivalent to the number of significant eQTLs present in each bin at each round. Enrichment for overlap with liver-specific eQTLs was performed in a similar manner except percent overlap with eQTLs with a GTEx q-value < 0.05 only in liver was compared to tissue specific eQTLs in all other tissue types. The number of tissue-specific eQTLs ranged from ~2500 to ~25000 and liver fell roughly at the median with ~5000 eQTLs. To assess relative eQTL enrichment between DAPs a linear model was fit regressing the number of observed significant eQTL overlaps by the total number of binding sites for each factor (Number of Significant eQTL Overlapping Sites ~ Number of Total Sites) with the R “lm” function. The relative enrichment for each factor was assessed as the residual error for each factor from the expected overlap fit by the linear model. This enrichment was compared to the coefficient of variation or relative standard deviation (σ/μ) to all genes with TSSs within 5Kb (and a variety of other thresholds) of a given factor’s binding site.

*DAP-binding site overlap with NHLBI GRASP GWAS SNPs*

The NHLBI GRASP2.0 catalog of GWAS studies (<https://s3.amazonaws.com/NHLBI_Public/GRASP/GraspFullDataset2.zip>) was used to obtain genomic coordinates of published GWAS SNPs. All SNPs present in the catalog were used for analysis. Prior to analysis, phenotype terms relevant to liver physiology were selected for comparing HEPG2 and Tissue ChIP-seq experiments. Next, overlapping binding sites from all DAPs (excluding EGR1, which wasn’t assayed in HepG2) were merged into a master binding site list and GWAS SNPs associated with each phenotype in the GRASP catalog located in a HEPG2 or adult tissue binding site were counted. A simple Fisher’s exact test was performed comparing the proportion of each individual GWAS phenotype term’s SNPs that fell within a binding site to the total number GWAS SNPs in the GRASP catalog that overlapped a binding site.

*Support vector machine training*

Support vector machines (SVMs) were trained on replicate-concordant narrow peak sites from the adult liver using a method previously established (Lee 2016; Ghandi et al. 2014). Briefly, genome sequence was obtained in FASTA format for each narrow peak using the Bedtools “getfasta”command. A GC content, repeat content, and length matched set of null peak sites 10 times greater in number than the number of concordant peak sites observed for each factor was obtained from the kmersvm galaxy web site (<http://kmersvm.beerlab.org>) using the “Generate Null Sequence” function. SVMs were trained on narrow peak and matched background sequences using gapped 10-bp kmers and allowing for 3 non-informative bases using the “gkmtrain” executable obtained from the ls-gkm github webpage (<https://github.com/Dongwon-Lee/lsgkm>). All other settings were left at default. This resulted in 20 SVMs, one for each DAP analyzed. Model performance was determined using receiver-operator characteristic area under the curve (ROC-AUC) and precision recall area under the curve (PR-AUC) on predictions from 5-fold cross validation. ROC-AUC and PR-AUC curves were constructed using the “PRROC” package in R.

*Delta binding score and GERP Correlation*

To determine the relationship of conservation and the importance of each base pair in predicting binding site status in the SVM, we performed individual *in silico* mutations of every reference sequence nucleotide in each narrow peak site by mutating them to the three other possible alternates for each DAP. This resulted in 100bp sequences with a single base-pair change for each base in the reference narrow peak, generating a total of 300 mutant sequences for each narrow peak. Each mutant sequence was scored with the original SVM trained on its respective DAP. The classifier value obtained for the 3 possible alternate alleles at each reference base was averaged and then subtracted from the reference sequence classifier value to obtain a delta binding score for each base within each narrow peak, indicative of the relative importance of each base for SVM classification performance. These scores were correlated with GERP-RS conservation and allele-specific bias at each site.

*Scoring GTEx eQTL SNPs*

To identify GTEx liver eQTL SNPs likely to disrupt DAP binding or cause *de novo* DAP binding, we obtained 100-bps of genome sequence centered on each liver eQTL SNP using the BEDTools “getfasta” command to generate two, 100bp sequence windows containing the reference or the alternate allele. The reference and alternate sequences were subsequently scored with the each of the 20 SVMs trained on each DAP analyzed. The reference classifier value was subtracted from the alternate allele to obtain a delta binding score as described above. Putative eQTL SNPs with DAP loss of binding had to overlap with a replicate-concordant narrow peak binding site, have a delta enhancer score in the bottom 0.1 percentile of all eQTL SNPs and possess a mutant classifier value less than 0. Conversely, putative eQTL SNPs with DAP gain of binding were defined as those not overlapping with a replicate-concordant narrow peak site and were required to yield a delta enhancer score in the top 99.9 percentile and possess a mutant classifier value greater than 0. Putative gain and loss of binding eQTL SNPs were queried in the NHLBI GRASP2.0 catalog of GWAS studies for potential disease relevance (Eicher et al. 2015). Enrichment for GRASP phenotype terms was assessed by Fisher’s exact test comparing the proportion of eQTL SNPs scoring in the top 1% of delta binding scores and significantly associated with a given GRASP phenotype term to the proportion of SNPs significantly associated with a given GRASP phenotype term in the entire population of liver eQTL SNPs.

*In vitro reporter assays*

All reporter assays were performed in HepG2 hepatocarcinoma cell lines. We randomly selected five liver eQTL SNPs in the top 0.1% of all delta binding scores. A single copy of the ~300 bp surrounding the reference and alternate alleles for each SNP were cloned into the pGL4.23 vector (Promega) multiple cloning site upstream of a minimal promoter driving luciferase (*luc2*) expression using Gibson Assembly (Gibson Assembly Master Mix, NEB). Exact sequence coordinates used in reporter assays are found in supplemental table 14. Plasmid DNA was extracted from three separate colonies with the Spin Miniprep Kit (Qiagen) and sequence verified with Sanger sequencing (MCLAB, San Francisco, CA). Each colony was treated as a separate biological replicate for a given sequence. HepG2 cells were seeded at 40,000 cells per well in antibiotic free DMEM with 10% FBS in a 96-well plate. After 24 hours, 300ng of plasmid DNA for each biological replicate was transfected into HepG2 cells using FuGENE (Promega) in duplicate, resulting in 6 total replicates (3 biological X 2 technical) per reference or alternate sequence. Luciferase activity was measured 48-hours post-transfection with a 2-second integration time on a LMax II 384 Luminometer (Molecular Devices). Background subtracted luminescence values for each SNP were z-scored. Significance in expression was determined using a 2-tailed Student’s T-test.

*Liver cancer RNA-seq analyses*

RNA-seq, DNA methylation and copy number variation data was obtained with permission from NCI-GDC data portal (https://gdc-portal.nci.nih.gov/). Raw RNA-seq read counts were obtained from matched tumor and adjacent normal pairs for 49 TCGA patients. Differential expression between tumor and adjacent normal was determined using DESeq2 (Love et al. 2014) using default settings. Enrichment for proximal binding near differentially expressed genes was performed using the Kologomorov-Smirnov test-based approach described above by comparing differentially expressed genes (DESeq2 FDR<0.001, n=9,832) with a background set of genes that received at least one sequencing read in one sample.

*Liver cancer DNA methylation analysis*

Methylation beta values from the Illumina Infinium HumanMethylation450 chip array were obtained for 50 matched tumor and adjacent normal tissue pairs. Probes with missing values (n=105,836) or with variance less than 0.001 (n=91,495) were removed prior to the analysis. Differential methylation was determined using the R package “samr” (Tusher et al. 2001). The non-parametric “SAM” function was used with the “resp.type” set to “Two class paired” and “nperms” set to 3,000. Differentially methylated probes were defined as those with a median beta value difference greater than 0.1 between tumor and adjacent normal tissues and a SAM q-value less than 5 (n=85,088). The percent of replicate-concordant narrow peaks overlapping a differentially methylated probe for each DAP was determined using the BEDTools “intersect” function. This was compared to the percent in overlap using 1000 randomly-selected probes of equivalent number.

*Liver cancer Somatic single nucleotide variant analysis*

Somatic mutation data was obtained from the International Cancer Genome Consortium (ICGC) data release 23 from the LIRI-JP project consisting of somatic SNVs from 258 patients with liver cancer (Fujimoto et al. 2016). A total of 2,691,076 SNVs were found in this dataset. Somatic mutation burden at the binding site and flanking regions for each DAP were obtained by intersecting the somatic mutation coordinates with contiguous 10-bp bins spanning the binding site regions, along with 1000bp of flanking sequence. A similar analysis was performed on the Thousand Genomes (TG) project SNVs by randomly sampling mutations from the Phase 3 variant call format file while conserving the nucleotide mutation proportions relative to the observed cancer mutations (Auton et al. 2015). A simple logistic regression was performed with the “glm” function in R to test for significant enrichment of somatic mutation burden within binding sites for each DAP compared to flanking regions, while correcting for GC content as follows:

Binding Site Status ~ GC content + Somatic Mutation Count

where binding site status is a binary variable indicating whether a 10-bp window is contained within a narrow peak or a flanking region, GC content is a continuous variable ranging from 0 to 1 indicating the fraction of G or C nucleotides in a 10bp window and Somatic Mutation Count is the number of SNVs found within a 10bp bin. To identify putative binding-disruptive somatic SNVs, a similar method was used as described above for GTEx eQTL SNPs. Briefly a 100-bp of sequence centered on the SNV was obtained and scored with all 20 SVMs trained on each DAP for the reference and alternate allele. The delta-binding scores were calculated as the difference in SVM classifier or fitted decision values between the mutant and wild-type sequence.
