# Supplementary figures and images for: A genome-wide interactome of DNA-associated proteins in the human liver
Source: PubMed Central journal article supplement — Genome Res. 2017 Nov;27(11):1950–60. doi: 10.1101/gr.222083.117 (PMC5668951; doi:10.1101/gr.222083.117), 2017-11

# Mean GERP Score

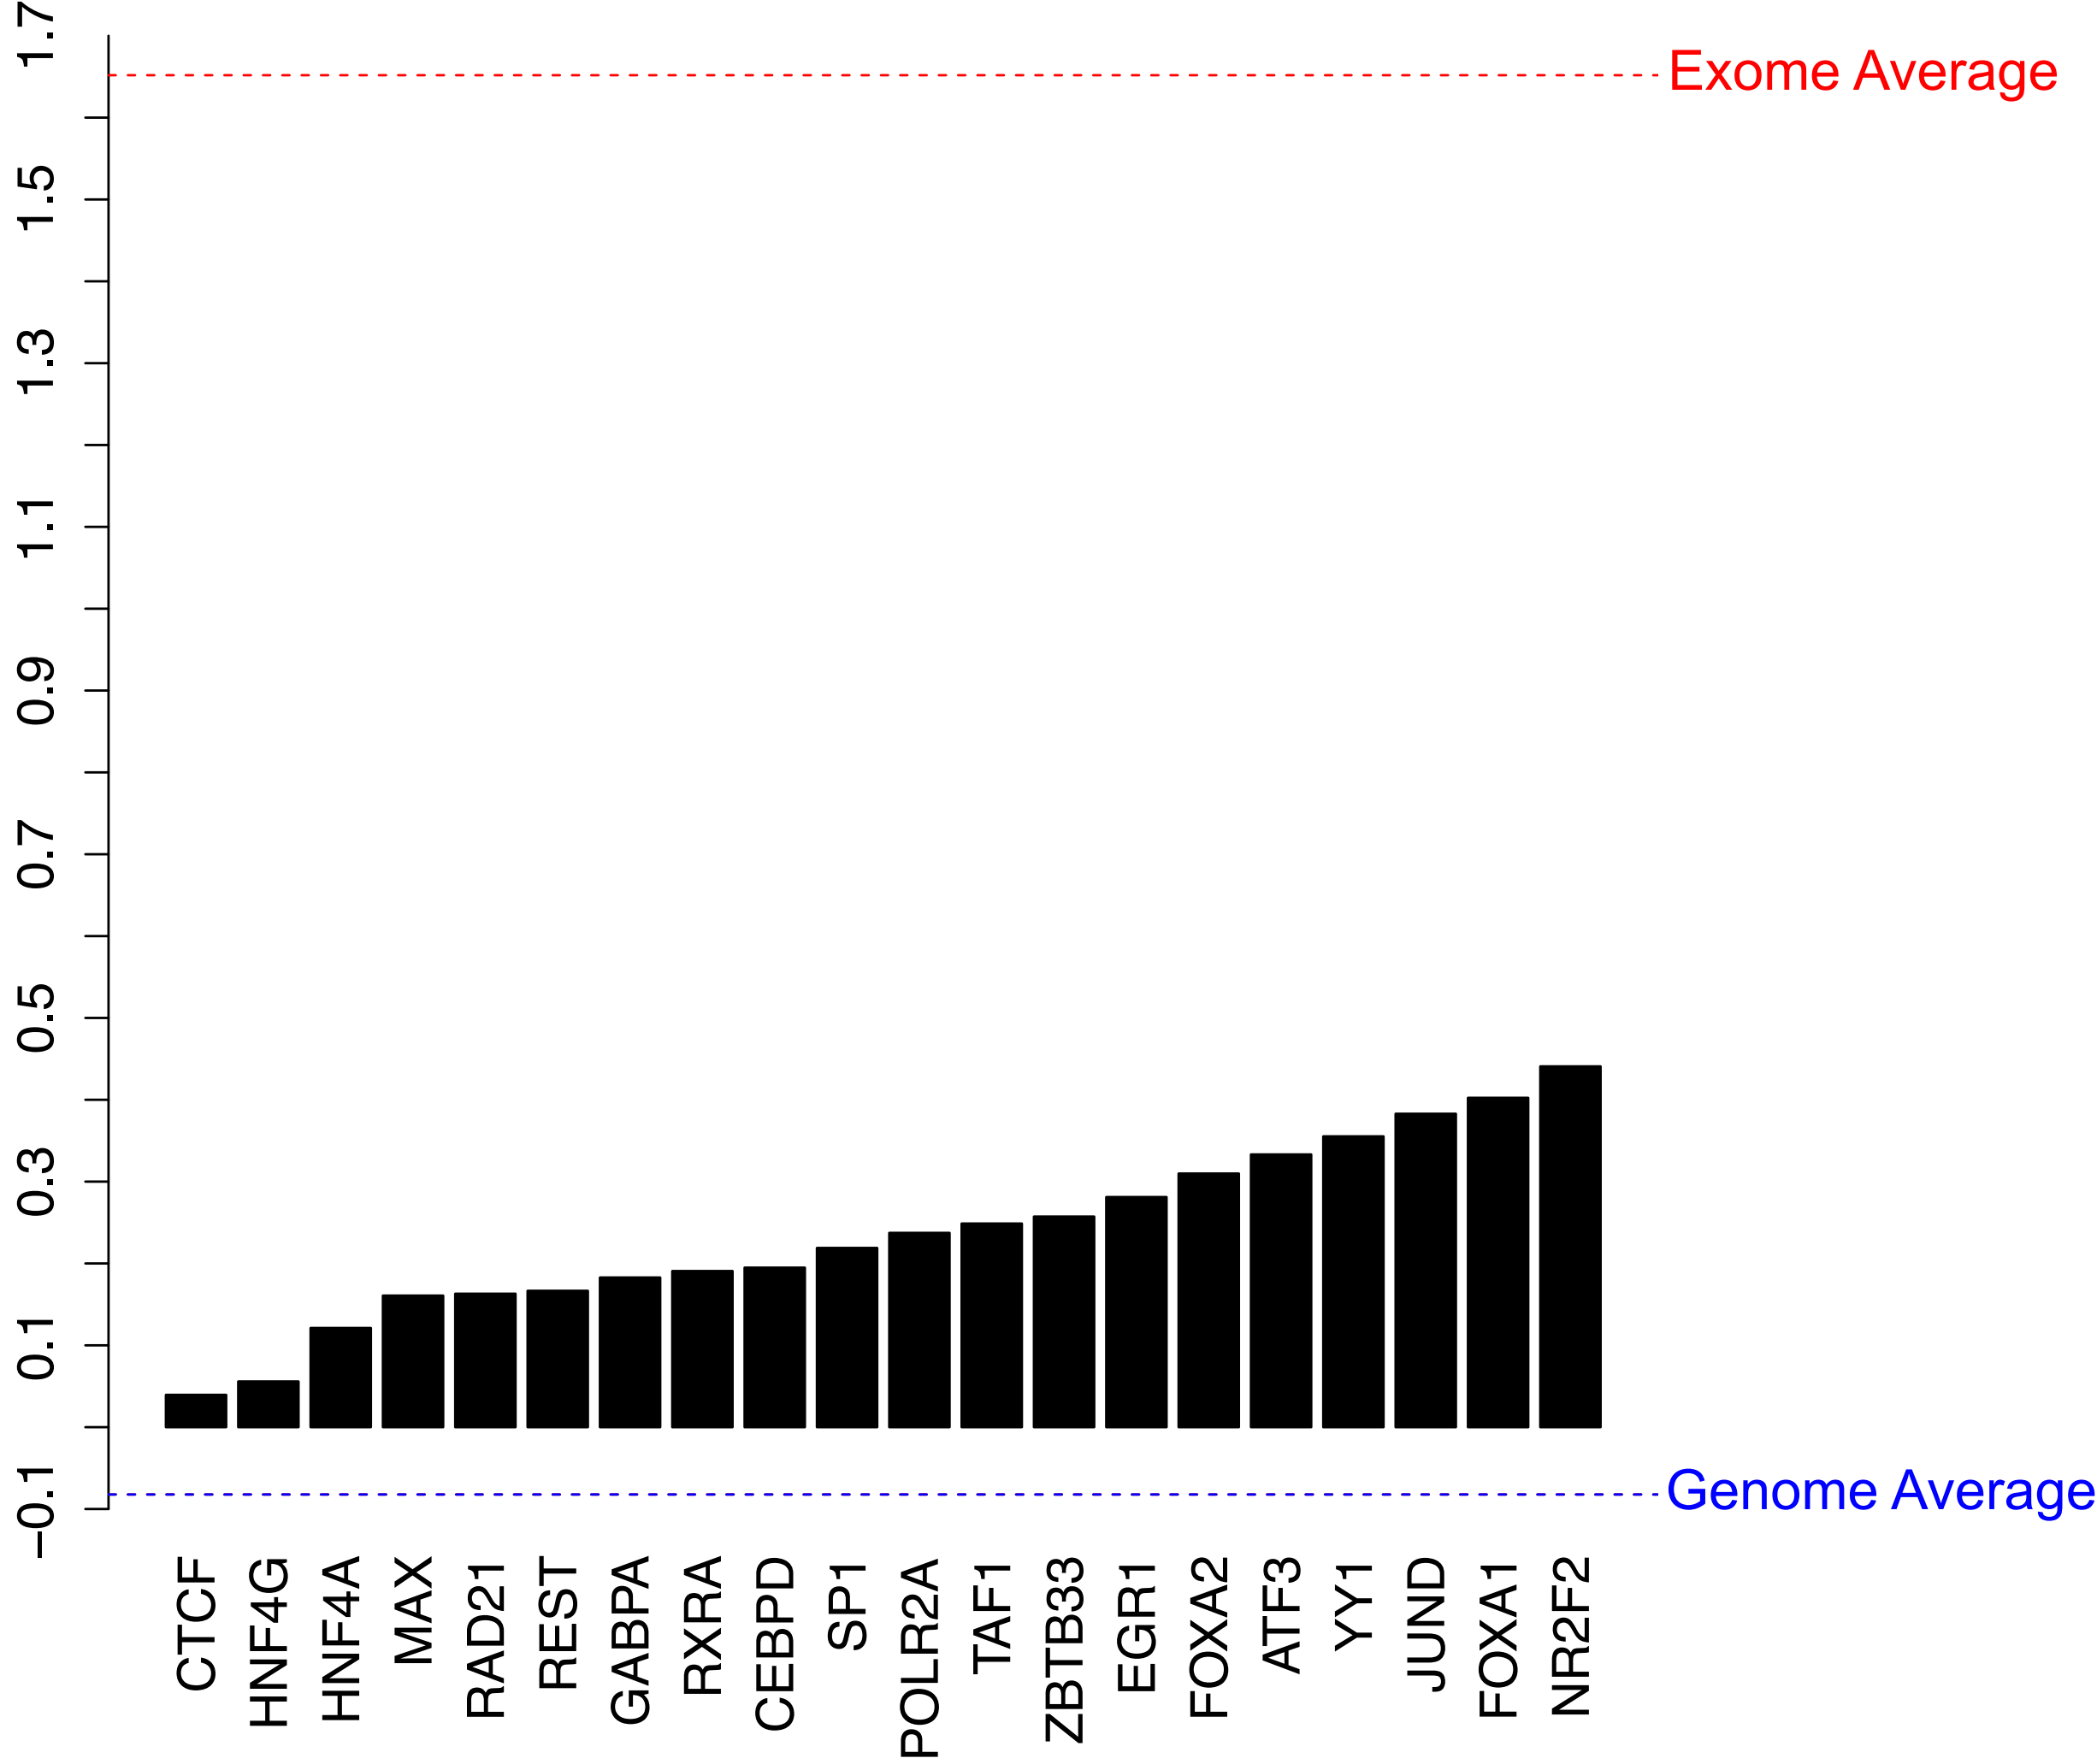

Supplement: supp_gr.222083.117_Supplemental_Fig_S15.pdf [file supp_gr.222083.117_Supplemental_Fig_S15.pdf]
